# Supplementary material
Source: Frontiers journal article supplement (https://www.frontiersin.org/articles/464497)
Supplement: Table_1.xls [file Table_1.xls]

## Sheet: Table S1
Table S1: Metabolism overview and expression status of differntially expressed genes in PRJNA385719, Fold change: treated vs untreated
BinCode	BinName	id	description	Up/Down	Fold change
3.5	minor CHO metabolism.others	115347	no description |258.242857142857	Up	0.847945
3.5	minor CHO metabolism.others	158244	{LCI28} low-CO2-induced putative aldose reductase. |647.879761904762	Down	-0.946351
3.5	minor CHO metabolism.others	147383	no description |193.661111111111	Down	-0.150382
3.5	minor CHO metabolism.others	111372	PfkB-type carbohydrate kinase family protein, ribokinase |246	Down	-3.82847
3.5	minor CHO metabolism.others	169453	no description |125.1	Up	0.574233
3.5	minor CHO metabolism.others	187168	{AEP} Aldose-1-epimerase |732.114374293281	Up	0.356489
3.5	minor CHO metabolism.others	97880	no description |373.645238095238	Up	1.51645
3.5	minor CHO metabolism.others	144222	{COG8} Component of oligomeric golgi complex 8 |340	Down	-1.81319
3.5	minor CHO metabolism.others	190792	{RSP5} Radial spoke protein 5 |94.4	Up	0.177261
10.1	cell wall.precursor synthesis	152568	no description |91.7	Up	0.391966
10.1.1.1	cell wall.precursor synthesis.NDP sugar pyrophosphorylase.GDP mannose	130417	{GMP1} GDP-D-mannose pyrophosphorylase |889.666666666667	Down	-1.47804
10.1.1.20	cell wall.precursor synthesis.NDP sugar pyrophosphorylase.multiple NDP-Sugars	32796	{UAP2} UDP-N-acetylglucosamine-pyrophosphorylase like protein |410	Down	0.379283
10.1.4	cell wall.precursor synthesis.UGD	185081	{UGD2} UDP-glucose dehydrogenase |2290.35	Up	0.280991
10.1.5	cell wall.precursor synthesis.UXS	135101	{GAD1} UDP-D-glucuronic acid decarboxylase |1179.86666666667	Up	0.304778
10.1.6	cell wall.precursor synthesis.GAE	151368	{NDE2} NAD-dependent epimerase/dehydratase |879.583333333333	Up	0.909151
10.1.10	cell wall.precursor synthesis.RHM	158152	no description |430.333333333333|419	Down	-0.473142
10.1.10	cell wall.precursor synthesis.RHM	111778	no description |814.166666666667	Up	0.639642
10.1.11	cell wall.precursor synthesis.UER	158152	no description |430.333333333333|419	Down	-0.473142
10.1.20	cell wall.precursor synthesis.phosphomannose isomerase	196572	{MPI} mannose-6-phosphate isomerase like |375	Down	-0.679586
2.1.2.1	major CHO metabolism.synthesis.starch.AGPase	136037	{STA6 } ADP-glucose pyrophosphorylase small subunit |3220.97731712984	Up	0.00332808
2.1.2.2	major CHO metabolism.synthesis.starch.starch synthase	185710	soluble starch synthase, ADP-glucose alpha-1,4 glucane alpha-4-glucanotransferase |1369.10480302721	Up	0.668441
2.1.2.2	major CHO metabolism.synthesis.starch.starch synthase	503	{STA2} Putative granule-bound starch synthase I |2546.20204501325	Up	0.353589
2.1.2.2	major CHO metabolism.synthesis.starch.starch synthase	191662	{STA3} soluble starch synthase III , ADP-glucose alpha-1,4 glucane alpha-4-glucanotransferase |1545.52054535248	Up	0.190587
2.1.2.3	major CHO metabolism.synthesis.starch.starch branching	118976	{Starch Branching Enzyme} Starch Branching Enzyme |2598.53333333333	Up	0.367524
2.1.2.3	major CHO metabolism.synthesis.starch.starch branching	94079	{Starch Branching Enzyme} Starch Branching Enzyme |2393.84166666667	Down	-0.376818
2.1.2.4	major CHO metabolism.synthesis.starch.debranching	132067	isoamylase, starch debranching enzyme |1080.05833333333	Down	-2.53888
2.1.2.5	major CHO metabolism.synthesis.starch.transporter	196520	{ANT1} ANT1 Adenine Nucleotide Translocator 1, mitochondrial |1946.37936507937	Down	-0.0676029
2.2.2.1	major CHO metabolism.degradation.starch.starch cleavage	128630	{GLH1} glycoside-hydrolase-like protein |1400.78015873016|1400.78015873016	Up	0.149396
2.2.2.1	major CHO metabolism.degradation.starch.starch cleavage	112511	{beta-amylase} beta-amylase |1358.53622375137	Down	-0.273443
2.2.2.1	major CHO metabolism.degradation.starch.starch cleavage	129211	beta-amylase |1325.83720005299	Down	-0.0744199
2.2.2.1	major CHO metabolism.degradation.starch.starch cleavage	58178	{alpha-amylase} alpha-amylase |1742.14436396936	Down	-0.548155
2.2.2.3	major CHO metabolism.degradation.starch.glucan water dikinase	192398	no description |1014.445	Down	-0.170072
2.2.2.4	major CHO metabolism.degradation.starch.D enzyme	122203	no description |999.81908127401	Down	-1.54275
2.2.2.4	major CHO metabolism.degradation.starch.D enzyme	140452	{STA11 } 4-alpha-glucanotransferase |1064.51870473098	Down	-1.93468
21.2	redox.ascorbate and glutathione	139735	{MDAR} monodehydroascorbate reductase |915	Down	-0.88871
21.2	redox.ascorbate and glutathione	131692	{CYB5_1} |326.808712121212	Down	-0.295452
21.2	redox.ascorbate and glutathione	149810	no description |126	Up	0.610045
21.2.1	redox.ascorbate and glutathione.ascorbate	146799	no description |174.675	Down	-0.243281
21.2.1	redox.ascorbate and glutathione.ascorbate	186597	{APX1} ascorbate peroxidase |1281.90281723108	Down	-0.804348
21.2.1	redox.ascorbate and glutathione.ascorbate	143082	{DHAR} dehydroascorbate reductase |286.806666666667	Down	-0.57347
21.2.2	redox.ascorbate and glutathione.glutathione	188373	{GPX4} Glutathione peroxidase, possibly chloroplastic |703.902930460401	Down	-0.603239
21.2.2	redox.ascorbate and glutathione.glutathione	134165	{GSHR1} glutathione reductase |1946.49404761905	Down	-0.306874
21.2.2	redox.ascorbate and glutathione.glutathione	181975	{GSH1} |1676.62752821131	Down	-0.521318
1.1.1.1	PS.lightreaction.photosystem II.LHC-II	98563	no description |394.364782714705|411.088137566138	Down	-0.180757
1.1.1.1	PS.lightreaction.photosystem II.LHC-II	184810	{Lhcb4} |1225.13066192216	Down	-0.192095
1.1.1.2	PS.lightreaction.photosystem II.PSII polypeptide subunits	127879	no description |155	Down	-2.63499
1.1.1.2	PS.lightreaction.photosystem II.PSII polypeptide subunits	187371	no description |96.3	Down	-1.75362
1.1.1.2	PS.lightreaction.photosystem II.PSII polypeptide subunits	155150	{PSBW} Photosystem II subunit W, chloroplast precursor |392.25	Up	1.46233
1.1.1.2	PS.lightreaction.photosystem II.PSII polypeptide subunits	187308	{OHP1} low CO2 and stress-induced one-helix protein |100	Down	-0.0422398
1.1.1.2	PS.lightreaction.photosystem II.PSII polypeptide subunits	153656	{OEE3} oxygen-evolving enhancer protein 3, chloroplast precursor, (PSBQ) |631.199339936184	Down	-0.496697
1.1.1.2	PS.lightreaction.photosystem II.PSII polypeptide subunits	196341	{PSBS} chloroplast PsbS |301	Down	-3.01607
1.1.1.2	PS.lightreaction.photosystem II.PSII polypeptide subunits	130316	{PSBO} Oxygen-evolving enhancer protein 1 of photosystem II |1730.18865003427	Up	1.02043
1.1.2.1	PS.lightreaction.photosystem I.LHC-I	98563	no description |394.364782714705|411.088137566138	Down	-0.180757
1.1.2.1	PS.lightreaction.photosystem I.LHC-I	153678	{LHCA3} light-harvesting chlorophyll-a/b protein of photosystem I (Type III) |527.077521008403	Up	0.32724
1.1.2.2	PS.lightreaction.photosystem I.PSI polypeptide subunits	76146	{PSAE} |338.8125	Down	-0.0690001
1.1.2.2	PS.lightreaction.photosystem I.PSI polypeptide subunits	182959	no description |533.579054877507	Down	-0.101864
1.1.2.2	PS.lightreaction.photosystem I.PSI polypeptide subunits	193847	{PSAO } Photosystem I subunit O |91.3	Up	0.505913
1.1.2.2	PS.lightreaction.photosystem I.PSI polypeptide subunits	130914	{PSAF} photosystem I reaction center subunit III, chloroplast precursor |919.660633253035	Up	0.307658
1.1.2.2	PS.lightreaction.photosystem I.PSI polypeptide subunits	165416	{PSAG} photosystem I reaction center subunit V, chloroplast precursor |329.011764764664	Down	-0.527414
1.1.4	PS.lightreaction.ATP synthase	132678	{ATPD} ATP synthase delta chain, chloroplast precursor |836.291666666667	Up	0.650496
1.1.4	PS.lightreaction.ATP synthase	134235	{ATPC} ATP synthase gamma chain, chloroplast precursor |1653.25	Up	0.829466
1.1.5.1	PS.lightreaction.other electron carrier (ox/red).plastocyanin	185915	{PCY1} plastocyanin, chloroplast precursor |871.739590518136	Up	0.289273
1.1.5.2	PS.lightreaction.other electron carrier (ox/red).ferredoxin	196705	{FDX4} Apoferredoxin, chloroplast precursor |208.689458293731	Down	-1.37641
1.1.5.2	PS.lightreaction.other electron carrier (ox/red).ferredoxin	174881	possible 2Fe-2S ferredoxin |118.2	Down	-1.46229
1.1.5.2	PS.lightreaction.other electron carrier (ox/red).ferredoxin	196707	{FDX3} Apoferredoxin, chloroplast precursor |335.042155263038	Down	-1.88954
1.1.5.2	PS.lightreaction.other electron carrier (ox/red).ferredoxin	147787	{PETF} Apoferredoxin, chloroplast precursor |958.108606589489	Up	0.0128705
1.1.5.2	PS.lightreaction.other electron carrier (ox/red).ferredoxin	196703	{FDX6} Apoferredoxin, chloroplast precursor |258.725633383224	Down	-0.798263
1.1.5.3	PS.lightreaction.other electron carrier (ox/red).ferredoxin reductase	134840	{ARH1} NADP adrenodoxin-like ferredoxin reductase |362	Up	1.08239
1.1.6	PS.lightreaction.NADH DH	182980	{NUO9 } NADH:ubiquinone oxidoreductase (Complex I) ND9 subunit, mitochondrial |232.142277722278	Up	1.15903
1.1.30	PS.lightreaction.state transition	194793	{STT7} protein kinase involved in state transitions |1934.33333333333	Up	0.725415
1.1.30	PS.lightreaction.state transition	154569	{STL1} Serine/threonine protein kinase, active site, Stl1 (Q84V17_CHLRE) |426.5|473.77529961882	Down	-1.35129
1.1.40	PS.lightreaction.cyclic electron flow-chlororespiration	185013	{NUO7 } NADH:ubiquinone oxidoreductase (Complex I) ND7 subunit, mitochondrial |1339.46529279544	Up	0.948591
1.1.40	PS.lightreaction.cyclic electron flow-chlororespiration	189624	{PTOX1} alternative oxidase, possibly chloroplast-localized |235	Up	0.189477
1.1.40	PS.lightreaction.cyclic electron flow-chlororespiration	132909	{NUO8 } NADH:ubiquinone oxidoreductase (Complex I) subunit, homolog to bovine TYKY subunit, mitochondrial |591.181939053593|562	Up	0.0787146
1.3.2	PS.calvin cyle.rubisco small subunit	82986	{RBCS1} ribulose-1,5-bisphosphate carboxylase/oxygenase small subunit 1, chloroplast precursor |1851.82989553062	Up	0.517188
1.3.3	PS.calvin cyle.phosphoglycerate kinase	132210	{PGK1} Phosphoglycerate Kinase |2493.95	Down	-0.775661
1.3.4	PS.calvin cyle.GAP	129019	{GAP3} Glyceraldehyde-3-Phosphate Dehydrogenase |2253.94480519481	Up	0.693204
1.3.4	PS.calvin cyle.GAP	102889	{GAPN1} Glyceraldehyde 3-phosphate dehydrogenase, nonphosphorylating |2046.5	Down	-0.642246
1.3.5	PS.calvin cycle.TPI	26265	{TPIC} triose phosphate isomerase (TIM), chloroplast precursor |896.666666666667	Down	-0.528949
1.3.6	PS.calvin cyle.aldolase	24459	no description |2143.72777777778	Up	0.392271
1.3.7	PS.calvin cyle.FBPase	24084	{FBP} Fructose-1,6-bisphosphatase, plastid precursor |1818	Up	0.732127
1.3.8	PS.calvin cyle.transketolase	141319	{TRK} Transketolase, plastid precursor |2676.15	Up	1.37509
1.3.9	PS.calvin cyle.seduheptulose bisphosphatase	189186	{SBP1} sedoheptulose-1,7-bisphosphatase |1767.125	Up	0.296532
1.3.11	PS.calvin cyle.RPE	135614	{RPE1} Ribulose phosphate-3-epimerase, chloroplast precursor |666.142139620753	Down	-0.885707
1.3.12	PS.calvin cyle.PRK	195910	{PRK} Phosphoribulokinase, chloroplast precursor |2429.25	Down	-0.281824
1.3.13	PS.calvin cyle.rubisco interacting	150261	{PMT} protein N-methyltransferase |142.65	Down	-0.812541
1.3.13	PS.calvin cyle.rubisco interacting	193086	no description |453	Down	-1.45195
1.3.13	PS.calvin cyle.rubisco interacting	128745	{RCA} rubisco activase |3314.74356060606	Up	0.479496
1.3.13	PS.calvin cyle.rubisco interacting	150732	no description |136.68	Down	-0.336466
1.2.1	PS.photorespiration.phosphoglycolate phosphatase	142105	{PGP3} Phosphoglycolate phosphatase, chloroplast precursor |591.554681163532	Up	0.0966044
1.2.1	PS.photorespiration.phosphoglycolate phosphatase	127857	{PGP2} Phosphoglycolate phosphatase, chloroplast precursor |393.39588108745	Up	0.0820016
1.2.1	PS.photorespiration.phosphoglycolate phosphatase	196298	{PGP1} phosphoglycolate phosphatase 1 |806	Down	-1.79327
1.2.2	PS.photorespiration.glycolate oxydase	127775	{GOX} Glycolate oxidase |836	Up	2.40284
1.2.3	PS.aminotransferases peroxisomal	194541	{AGT1} alanine-glyoxylate transaminase, putative |135|135	Down	-1.61302
1.2.3	PS.aminotransferases peroxisomal	194609	{SGA1} Putative serine glyoxylate aminotransferase, variant SGA1a |398|398	Down	-0.723684
1.2.4	PS.photorespiration.glycine cleavage	196067	{GCSH} glycine cleavage system, H-protein |632.429801916239	Down	-0.975737
1.2.5	PS.photorespiration.serine hydroxymethyltransferase	196400	{SHMT3} serine hydroxymethyltransferase 3 |2962.10780920636	Up	0.747914
1.2.5	PS.photorespiration.serine hydroxymethyltransferase	196354	{SHMT2} serine hydroxymethyltranferase 2 |2880.26084170815	Down	-1.96885
1.2.5	PS.photorespiration.serine hydroxymethyltransferase	194461	{SHMT1} Serine hydroxymethyltransferase |3377.14404761905	Down	-0.694831
1.2.6	PS.photorespiration.hydroxypyruvate reductase	128310	{HPR1} Hydroxypyruvate reductase |757.1625|725.9625|725.9625	Down	-0.765787
1.2.7	PS.photorespiration.glycerate kinase	196366	{GLYK} glycerate kinase |192	Down	-0.86956
19.1	tetrapyrrole synthesis.glu-tRNA synthetase	135584	{CHLI2 } CHLI Magnesium chelatase subunit I, chloroplast precursor |1379.64642857143	Up	0.202867
19.1	tetrapyrrole synthesis.glu-tRNA synthetase	188401	{GAT1} Glutamyl tRNA amidotransferase, subunit A |410	Down	-0.0398492
19.1	tetrapyrrole synthesis.glu-tRNA synthetase	195543	{GTS1 } Gln-Glu (Glx) non discriminatory tRNA synthetase, chloroplast precursor |661.16|704.51	Up	1.23087
19.1	tetrapyrrole synthesis.glu-tRNA synthetase	134594	{CHLD } Magnesium chelatase subunit D, chloroplast precursor |1962.64404761905	Up	0.66982
19.2	tetrapyrrole synthesis.glu-tRNA reductase	183460	{HEMA} Glutamyl-tRNA reductase, chloroplast precursor |2370.69126158217	Down	-0.0443636
19.2	tetrapyrrole synthesis.glu-tRNA reductase	183446	{HEM15 } Ferrochelatase, chloroplast precursor |778.8	Down	-2.24797
19.3	tetrapyrrole synthesis.GSA	138524	{GSA } Glutamate-1-semialdehyde aminotransferase, chloroplast precursor |2933.02857142857	Up	0.695389
19.4	tetrapyrrole synthesis.ALA dehydratase	186639	{ALAD ,ALAD} Delta-aminolevulinic acid dehydratase, chloroplast precursor |2251.94369230574	Down	-0.0193511
19.5	tetrapyrrole synthesis.porphobilinogen deaminase	194475	{PBGD1} Porphobilinogen deaminase, putative chloroplast precursor |1068.59288744443	Down	-0.29255
19.6	tetrapyrrole synthesis.uroporphyrinogen III synthase	195943	{UROS} Uroporphyrinogen-III synthase, putative chloroplast precursor |259.251209461613	Down	-0.156954
19.7	tetrapyrrole synthesis.uroporphyrinogen decarboxylase	132194	{UROD1} Uroporphyrinogen-III decarboxylase, chloroplast precursor |1674.84288975886	Down	-0.888847
19.7	tetrapyrrole synthesis.uroporphyrinogen decarboxylase	195818	{UROD3} Uroporphyrinogen decarboxylase |1330.69658266168	Down	-0.0712977
19.8	tetrapyrrole synthesis.coproporphyrinogen III oxidase	53583	{CPX1} Coproporphyrinogen III oxidase, chloroplast precursor |1314.35	Down	-0.28973
19.9	tetrapyrrole synthesis.protoporphyrin IX oxidase	191043	{PPO} Protoporphyrinogen oxidase, chloroplast precursor |1170.85	Down	-0.0677089
19.10	tetrapyrrole synthesis.magnesium chelatase	195524	{CHLH1} CHLH Magnesium chelatase subunit H, chloroplast precursor |1795	Down	-1.44455
19.11	tetrapyrrole synthesis.magnesium protoporphyrin IX methyltransferase	195575	{CHLM} Magnesium protoporphrin IX S-adenosyl methionine O-methyl transferase, chloroplast precursor |307	Up	0.244851
19.13	tetrapyrrole synthesis.divinyl chlorophyllide-a 8-vinyl-reductase	195952	{DVR} 3,8-divinyl protochlorophyllide a 8-vinyl reductase, chloroplast precursor |419	Down	-2.54045
19.15	tetrapyrrole synthesis.chlorophyll synthase	5437	{CHS,CHLG} Chlorophyll synthetase, chloroplast precursor |421	Down	-1.00003
19.16	tetrapyrrole synthesis.chlorophyll b synthase	195951	{CAO} Chlorophyll a oxygenase, chloroplast precursor |417	Up	0.777908
19.21	tetrapyrrole synthesis.heme oxygenase	195947	{HMOX1} Heme oxygenase |292.933333333333	Down	-1.01758
19.30	tetrapyrrole synthesis.urogen III methylase	191432	{COB1} S-adenosyl-L-methionine-dependent uroporphyrinogen III methyltransferase |563.541527832149	Down	-0.630108
19.40	tetrapyrrole synthesis.regulation	127367	{FLU} FLU chloroplast precursor |90.5	Up	0.911875
19.99	tetrapyrrole synthesis.unspecified	123320	{COX10 } cytochrome c oxidase assembly protein, heme A: farnesyltransferase |505.221712385125	Up	0.037007
9.1.2	mitochondrial electron transport / ATP synthesis.NADH-DH.localisation not clear	193762	{NUO13 } NADH:ubiquinone oxidoreductase (Complex I) 18 kDa subunit, homolog to bovine B17.2 subunit, mitochondrial |80.1	Down	-0.522086
9.1.2	mitochondrial electron transport / ATP synthesis.NADH-DH.localisation not clear	186185	{NUOA9 } NADH:ubiquinone oxidoreductase (Complex I) subunit, homolog to bovine 39 kD subunit, mitochondrial |224	Up	0.675945
9.1.2	mitochondrial electron transport / ATP synthesis.NADH-DH.localisation not clear	127317	{NUO5 } NADH:ubiquinone oxidoreductase (Complex I) 24 kDa subunit, homolog to bovine 24 kD subunit, mitochondrial |271	Down	-0.134368
9.1.2	mitochondrial electron transport / ATP synthesis.NADH-DH.localisation not clear	79362	{NUOS1} NADH:ubiquinone oxidoreductase 76 kD protein (Complex I 78 kD subunit), mitochondrial |724	Down	-0.156023
9.1.2	mitochondrial electron transport / ATP synthesis.NADH-DH.localisation not clear	132909	{NUO8 } NADH:ubiquinone oxidoreductase (Complex I) subunit, homolog to bovine TYKY subunit, mitochondrial |591.181939053593|562	Up	0.0787146
9.1.2	mitochondrial electron transport / ATP synthesis.NADH-DH.localisation not clear	186342	{NUO6 } NADH:ubiquinone oxidoreductase (Complex I) subunit, homolog to bovine 51 kD subunit, mitochondrial |745	Up	0.678099
9.2.1	mitochondrial electron transport / ATP synthesis.NADH-DH.type II.internal matrix	195719	{NDA1} putative mitochondrial type-II NADH dehydrogenase. |557	Up	0.310795
9.2.2	mitochondrial electron transport / ATP synthesis.NADH-DH.type II.external	133334	{NDA2} putative type-II calcium-dependant NADH dehydrogenase, mitochondrial |708.916666666667	Up	1.09518
9.3	mitochondrial electron transport / ATP synthesis.electron transfer flavoprotein	180281	{ETFB } putative electron transfer flavoprotein beta-subunit , mitochondrial |218	Up	0.0293756
9.3	mitochondrial electron transport / ATP synthesis.electron transfer flavoprotein	111715	{FUO1} Putative electron transfer flavoprotein-ubiquinone oxidoreductase. |796.359698224963	Down	-1.46715
9.3	mitochondrial electron transport / ATP synthesis.electron transfer flavoprotein	189344	{ETFA } putative electron transfer flavoprotein alpha-subunit , mitochondrial |253	Up	0.236004
9.4	mitochondrial electron transport / ATP synthesis.alternative oxidase	129968	{AOX1} |790.038690476191	Up	1.77392
9.5	mitochondrial electron transport / ATP synthesis.cytochrome c reductase	77031	{QCR7 } Ubiquinol:cytochrome c oxidoredutase (Complex III) 14 kDa subunit subunit |192.6	Up	0.523349
9.5	mitochondrial electron transport / ATP synthesis.cytochrome c reductase	129128	{RIP1} Rieske iron-sulfur protein of mitochondrial ubiquinol-cytochrome c reductase. |1137.55847885598	Down	-0.326418
9.6	mitochondrial electron transport / ATP synthesis.cytochrome c	133395	{CYC1} ubiquinol:cytochrome c oxidoreductase cytochrome c1, mitochondrial |910.083333333333	Down	-0.143709
9.6	mitochondrial electron transport / ATP synthesis.cytochrome c	195343	{CCS1} c-type cytochrome synthesis 1 |344	Up	1.66447
9.7	mitochondrial electron transport / ATP synthesis.cytochrome c oxidase	56014	{COX3} Cytochrome c oxidase subunit III |254	Up	0.838751
9.7	mitochondrial electron transport / ATP synthesis.cytochrome c oxidase	159985	{SCO1} Putative cytochrome c oxidase assembly factor SCO1, mitochondrial |276	Up	0.381864
9.7	mitochondrial electron transport / ATP synthesis.cytochrome c oxidase	190125	{COX2b} Cytochrome c oxidase subunit II, protein IIb of split subunit. |709.712015868338	Up	0.207526
9.7	mitochondrial electron transport / ATP synthesis.cytochrome c oxidase	146988	no description |163	Up	0.152398
9.7	mitochondrial electron transport / ATP synthesis.cytochrome c oxidase	184789	{COX2a} Cytochrome c oxidase subunit II, protein IIa of split subunit. |789.621428571429	Up	1.17724
9.7	mitochondrial electron transport / ATP synthesis.cytochrome c oxidase	95928	{COX18} putative cytochrome c oxidase assembly factor, mitochondrial |73.6	Down	-0.332002
9.8	mitochondrial electron transport / ATP synthesis.uncoupling protein	138059	{UCP1} uncoupling protein, probably mitochondrial |589.904192774033	Down	-0.988932
9.9	mitochondrial electron transport / ATP synthesis.F1-ATPase	136578	{ATP6} F1Fo ATP synthase subunit 6, mitochondrial |331.811607142857	Up	0.431466
9.9	mitochondrial electron transport / ATP synthesis.F1-ATPase	141145	{ATP1B} F1Fo ATP synthase, alpha subunit, mitochondrial |460.565905626961	Up	1.55873
9.9	mitochondrial electron transport / ATP synthesis.F1-ATPase	133544	{ATP15} F1Fo ATP synthase, epsilon subunit, mitochondrial |160.749145040502	Down	-1.82752
9.9	mitochondrial electron transport / ATP synthesis.F1-ATPase	78348	{ATP2} Beta subunit of mitochondrial ATP synthase. |3604.83566588057	Down	-0.730552
9.9	mitochondrial electron transport / ATP synthesis.F1-ATPase	185200	{ATP4} Mitochondrial F1Fo ATP synthase, delta subunit |199.425	Down	-0.679294
9.9	mitochondrial electron transport / ATP synthesis.F1-ATPase	76602	{ATP1} F1Fo ATP synthase, alpha subunit, mitochondrial |	Down	-1.04396
9.9	mitochondrial electron transport / ATP synthesis.F1-ATPase	191596	{ATP5} Mitochondrial ATP synthase subunit 5, OSCP subunit |192.95	Down	-0.917081
9.9	mitochondrial electron transport / ATP synthesis.F1-ATPase	194183	{ATP3} F1F0 ATP synthase, gamma subunit, mitochondrial |435	Up	0.00353984
4.2	glycolysis.PGM	18029	{GPM1b} Phosphoglucomutase, possible cytosolic form |2914.18214285714	Up	0.402845
4.3	glycolysis.G6PIsomerase	135220	{PGI} phosphoglucose isomerase |2373.34166666667	Up	1.19965
4.4	glycolysis.PPFK	196624	{PFK1P} Phosphofructokinase family protein, plastid form |897.588095238095	Up	-1.07894
4.4	glycolysis.PPFK	196430	{PFK2} Phosphofructokinase family protein |899.621428571429	Up	0.838074
4.7	glycolysis.aldolase	152892	{FBA1} fructose-1,6-bisphosphate aldolase |1363.05238095238	Down	-0.228816
4.7	glycolysis.aldolase	29185	{FBA2} fructose-1,6-bisphosphate aldolase |1469.50476190476	Down	-0.865096
4.9	glycolysis.glyceraldehyde 3-phosphate dehydrogenase	140618	{GAP1a} glyceraldehyde 3-phosphate dehydrogenase, plastid precursor |2532.47562902784	Down	-1.33986
4.11	glycolysis.phosphoglycerate mutase	161085	{PGM1b} Phosphoglycerate mutase, possible cytosolic form |2391.89940360599	Down	-0.109756
4.12	glycolysis.enolase	83064	{PGH,PGH1} Enolase (2-Phosphoglycerate Dehydratase) |2766.16163221731	Up	0.17391
4.13	glycolysis.PK	118203	{PYK9} pyruvate kinase |1325.09238816739	Down	-0.718828
4.13	glycolysis.PK	122254	{PYK5} pyruvate kinase |1304.69523809524	Up	0.148126
4.13	glycolysis.PK	136854	{PYK1} Pyruvate Kinase, probably cytosolic |2290.68033078033	Down	-0.928397
4.13	glycolysis.PK	196263	{PYK2} Pyruvate kinase, cytosolic |1256.40802669553	Up	0.923731
4.14	glycolysis.PEPCase	80312	{PEPC1} Phosphoenolpyruvate carboxylase, isoform 1 |2847.05048406784	Up	0.975738
4.14	glycolysis.PEPCase	182821	{PEPC2} Phosphoenolpyruvate carboxylase, isoform 2 |2525.68429677774	Up	1.02402
11.3	lipid metabolism.Phospholipid synthesis	194257	{PGP1b} |279.565582964251	Up	0.537225
11.3	lipid metabolism.Phospholipid synthesis	40158	{SDC1} |595|595	Up	0.166681
11.3	lipid metabolism.Phospholipid synthesis	142643	{KDG1} diacylglycerol kinase |295.232875428551	Up	1.89392
11.3.2	lipid metabolism.Phospholipid synthesis.choline kinase	118793	{ETK1} |284.3	Up	0.630065
11.3.3	lipid metabolism.Phospholipid synthesis.phosphatidate cytidylyltransferase	173650	no description |242	Down	-0.843284
11.3.4	lipid metabolism.Phospholipid synthesis.CDP-diacylglycerol-inositol 3-phosphatidyltransferase	186369	{PIS1} |228	Up	0.250601
11.3.7	lipid metabolism.Phospholipid synthesis.cyclopropane-fatty-acyl-phospholipid synthase	191650	{CFA1} |712.766666666667	Down	-0.586792
11.10.2	lipid metabolism.glycolipid synthesis.DGDG synthase	196553	{DGD1} galactolipid galactosyltransferase |1624	Up	0.573579
11.10.3	lipid metabolism.glycolipid synthesis.UDP-sulfoquinovose synthase	27658	{SQD1} UDP-sulfoquinovose synthase |1256.5	Up	0.0870666
11.10.4	lipid metabolism.glycolipid synthesis.sulfolipid synthase	121326	{SQD2b} |	Up	1.65505
11.8.1	lipid metabolism.'exotics' (steroids, squalene etc).sphingolipids	147241	{KDG2} diacylglycerol kinase |148.4	Up	0.857957
11.8.1	lipid metabolism.'exotics' (steroids, squalene etc).sphingolipids	119291	{SPT2} |314	Down	-0.0920856
11.8.1.3	lipid metabolism.'exotics' (steroids, squalene etc).sphingolipids.ceramide glucosyltransferase	34629	{GTR24} glycosyl transferase |94	Down	-0.590185
11.8.4	lipid metabolism.'exotics' (steroids, squalene etc).3-beta hydroxysteroid dehydrogenase/isomerase	58501	{HSD1} putative steroid dehydrogenase |379	Down	-0.0184387
11.8.6	lipid metabolism.'exotics' (steroids, squalene etc).cycloartenol synthase	196409	{CAS} cycloartenol synthase |1159.22594905095|1163	Up	1.03515
11.8.10	lipid metabolism.'exotics' (steroids, squalene etc).phosphatidylcholine—sterol O-acyltransferase	186846	{LACT} Lecithin:cholesterol acyltransferase |189.766666666667	Down	-1.03585
11.2.1	lipid metabolism.FA desaturation.desaturase	117883	{FAD5} |863.574069830993	Down	-2.55338
11.2.3	lipid metabolism.FA desaturation.omega 3 desaturase	56237	{FAD7} |1892.55337301587	Down	-4.51391
11.2.4	lipid metabolism.FA desaturation.omega 6 desaturase	56668	{DES6} |1169.16730392157	Down	-0.0803486
11.2.4	lipid metabolism.FA desaturation.omega 6 desaturase	135825	Fatty acid desaturase |979.975	Down	-1.39016
11.1.1	lipid metabolism.FA synthesis and FA elongation.Acetyl CoA Carboxylation	122970	{ACC} biotin carboxylase |611.184611825157	Down	-0.47082
11.1.1	lipid metabolism.FA synthesis and FA elongation.Acetyl CoA Carboxylation	183660	no description |99.6666666666667	Down	-1.4782
11.1.2	lipid metabolism.FA synthesis and FA elongation.Acetyl CoA Transacylase	101671	no description |261	Down	-1.1303
11.1.3	lipid metabolism.FA synthesis and FA elongation.ketoacyl ACP synthase	139619	{KAS2} |1006.5	Down	-0.657403
11.1.7	lipid metabolism.FA synthesis and FA elongation.ACP thioesterase	196283	acyl carrier protein thioesterase, putative |442.141522855281	Up	2.05507
11.1.8	lipid metabolism.FA synthesis and FA elongation.acyl coa ligase	194063	{ACS1} Acetyl CoA synthetase |1043.65722025815	Down	-0.983793
11.1.8	lipid metabolism.FA synthesis and FA elongation.acyl coa ligase	188925	no description |422.556359394601	Up	0.217485
11.1.12	lipid metabolism.FA synthesis and FA elongation.ACP protein	132151	{ACP1} acyl-carrier protein, probably mitochondrial |234.701841540633	Up	0.175388
11.1.13	lipid metabolism.FA synthesis and FA elongation.acyl-CoA binding protein	133008	{ACBP} |236.87130952381	Down	-1.7149
11.1.13	lipid metabolism.FA synthesis and FA elongation.acyl-CoA binding protein	141204	no description |457.77	Down	-1.67927
11.1.31	lipid metabolism.FA synthesis and FA elongation.pyruvate DH	155587	{PDC2} plastid pyruvate dehydrogenase, E1 component, alpha subunit |414	Down	-0.0327831
11.1.31	lipid metabolism.FA synthesis and FA elongation.pyruvate DH	196500	{DLA2} dihydrolipoamide acetyltransferase, possibly plastidic |384	Down	-1.82798
11.1.31	lipid metabolism.FA synthesis and FA elongation.pyruvate DH	190446	{PDH2} pyruvate dehydrogenase, E1 beta subunit, plastid precursor |802	Down	-0.555931
11.9.2	lipid metabolism.lipid degradation.lipases	108522	{LIPG1} putative carboxylic ester hydrolase/ lipase |294	Down	-0.0501557
11.9.2	lipid metabolism.lipid degradation.lipases	142444	no description |130.139020998429	Up	0.054318
11.9.2.1	lipid metabolism.lipid degradation.lipases.triacylglycerol lipase	184308	{FAP12} Flagellar Associated Protein |159.433333333333	Up	0.150282
11.9.2.1	lipid metabolism.lipid degradation.lipases.triacylglycerol lipase	142824	no description |53.5	Up	2.21903
11.9.2.1	lipid metabolism.lipid degradation.lipases.triacylglycerol lipase	122836	{LIPG2} triacylglycerol lipase (gastric ligase) precursor |291.6	Up	0.733592
11.9.3.3	lipid metabolism.lipid degradation.lysophospholipases.glycerophosphodiester phosphodiesterase	123120	{GDPD4} glycerophosphoryl diester phosphodiesterase family protein |408.174603174603	Up	0.540815
11.9.3.3	lipid metabolism.lipid degradation.lysophospholipases.glycerophosphodiester phosphodiesterase	141624	no description |90.5	Down	-0.251127
6.3	gluconeogenesis.Malate DH	137163	{MDH1} malate dehydrogenase |517.662878787879|573.715873015873	Down	-0.32451
6.3	gluconeogenesis.Malate DH	126023	{MDH2} malate dehydrogenase |1197.83333333333	Down	-0.335221
6.5	gluconeogenese/ glyoxylate cycle.pyruvate dikinase	196616	{PPD2} Pyruvate,phosphate dikinase (PPDK) |3477.62963667326	Up	1.00177
4.2	glycolysis.PGM	18029	{GPM1b} Phosphoglucomutase, possible cytosolic form |2914.18214285714	Up	0.402845
4.3	glycolysis.G6PIsomerase	135220	{PGI} phosphoglucose isomerase |2373.34166666667	Up	1.19965
4.4	glycolysis.PPFK	196624	{PFK1P} Phosphofructokinase family protein, plastid form |897.588095238095	Down	-1.07894
4.4	glycolysis.PPFK	196430	{PFK2} Phosphofructokinase family protein |899.621428571429	Up	0.838074
4.7	glycolysis.aldolase	152892	{FBA1} fructose-1,6-bisphosphate aldolase |1363.05238095238	Down	-0.228816
4.7	glycolysis.aldolase	29185	{FBA2} fructose-1,6-bisphosphate aldolase |1469.50476190476	Down	-0.865096
4.9	glycolysis.glyceraldehyde 3-phosphate dehydrogenase	140618	{GAP1a} glyceraldehyde 3-phosphate dehydrogenase, plastid precursor |2532.47562902784	Down	-1.33986
4.11	glycolysis.phosphoglycerate mutase	161085	{PGM1b} Phosphoglycerate mutase, possible cytosolic form |2391.89940360599	Down	-0.109756
4.12	glycolysis.enolase	83064	{PGH,PGH1} Enolase (2-Phosphoglycerate Dehydratase) |2766.16163221731	Up	0.17391
4.13	glycolysis.PK	118203	{PYK9} pyruvate kinase |1325.09238816739	Down	-0.718828
4.13	glycolysis.PK	122254	{PYK5} pyruvate kinase |1304.69523809524	Up	0.148126
4.13	glycolysis.PK	136854	{PYK1} Pyruvate Kinase, probably cytosolic |2290.68033078033	Down	-0.928397
4.13	glycolysis.PK	196263	{PYK2} Pyruvate kinase, cytosolic |1256.40802669553	Up	0.923731
4.14	glycolysis.PEPCase	80312	{PEPC1} Phosphoenolpyruvate carboxylase, isoform 1 |2847.05048406784	Up	0.975738
4.14	glycolysis.PEPCase	182821	{PEPC2} Phosphoenolpyruvate carboxylase, isoform 2 |2525.68429677774	Up	1.02402
8.1.1.1	TCA / org. transformation.TCA.pyruvate DH.E1	139515	{PDH1a} pyruvate dehydrogenase, E1 beta subunit, mitochondrial precursor |845	Down	-0.159167
8.1.1.2	TCA / org. transformation.TCA.pyruvate DH.E2	149709	{DLA1} dihydrolipoamide acetyltransferase, probably mitochondrial |1578.67519698441	Up	-0.296167
8.1.1.3	TCA / org. transformation.TCA.pyruvate DH.E3	57890	{DLDH1} dihydrolipoyl dehydrogenase, mitochondrial precursor |1558.16581333309	Down	-0.429264
8.1.2	TCA / org. transformation.TCA.CS	194915	{CIS1} citrate synthase, putative mitochondrial isoform |1723.41666666667	Up	0.721788
8.1.3	TCA / org. transformation.TCA.aconitase	132888	no description |1263.13712726114	Down	-0.513417
8.1.3	TCA / org. transformation.TCA.aconitase	129025	{ACH1} Aconitate hydratase, mitochondrial |1511.84883094342	Up	0.241834
8.1.4	TCA / org. transformation.TCA.IDH	196567	{IDH3} isocitrate dehydrogenase, NADP-dependent, mitochondrial |1865.41428571429	Up	0.362239
8.1.5	TCA / org. transformation.TCA.2-oxoglutarate dehydrogenase	79471	{OGD1} 2-oxoglutarate dehydrogenase, E1 subunit |1925.5	Up	1.07186
8.1.6	TCA / org. transformation.TCA.succinyl-CoA ligase	24101	{SCLB1a} Succinate-CoA ligase beta chain, mitochondrial precursor |835.75	Down	-0.329507
8.1.6	TCA / org. transformation.TCA.succinyl-CoA ligase	196570	{SCLA1} Succinyl-CoA ligase alpha-chain, mitochondrial precursor |936	Down	-0.880571
8.1.7	TCA / org. transformation.TCA.succinate dehydrogenase	145357	no description |126	Up	0.637882
8.1.9	TCA / org. transformation.TCA.malate DH	137163	{MDH1} malate dehydrogenase |517.662878787879|573.715873015873	Down	-0.32451
8.1.9	TCA / org. transformation.TCA.malate DH	60444	{MDHM} Malate dehydrogenase |1652.63333333333	Up	0.666674
8.2.4	TCA / org. transformation.other organic acid transformaitons.IDH	196044	{IDH2} isocitrate dehydrogenase, NAD-dependent |1154.93242800876	Up	0.497138
8.2.9	TCA / org. transformation.other organic acid transformaitons.cyt MDH	192083	{MDHP} NADP-Malate Dehydrogenase |1173.82619047619	Down	-0.44847
8.2.9	TCA / org. transformation.other organic acid transformaitons.cyt MDH	158129	{MDHC} Malate Dehydrogenase (NAD-dependent), cytosolic |1469.3380952381	Up	0.298324
8.2.10	TCA / org. transformation.other organic acid transformaitons.malic	126820	{MME6} NADP-dependent malic enzyme |2195.86627560735	Up	1.59522
8.2.10	TCA / org. transformation.other organic acid transformaitons.malic	196833	{MME1} NAD malic enzyme, mitochondrial precurser |2455.04898016936	Up	0.423246
8.2.10	TCA / org. transformation.other organic acid transformaitons.malic	196351	{MME5} NADP malic enzyme |1250.30244477188	Down	-0.690355
8.2.10	TCA / org. transformation.other organic acid transformaitons.malic	147722	{MME2} NADP malic enzyme |2214.1445359139	Up	0.946468
8.2.11	TCA / org. transformation.other organic acid transformaitons.atp-citrate lyase	186611	{ACLB1} ATP Citrate Lyase, subunit B |1134.5	Up	0.683908
16.1.1	secondary metabolism.isoprenoids.non-mevalonate pathway	136810	{GGR} geranylgeranyl reductase, putative chloroplast precursor |600	Down	-2.91807
16.1.1.1	secondary metabolism.isoprenoids.non-mevalonate pathway.DXS	196568	{DXS,DXS1} 1-deoxy-D-xylulose 5-phosphate synthase, putative chloroplast precursor |1561.5	Up	0.388996
16.1.1.3	secondary metabolism.isoprenoids.non-mevalonate pathway.CMS	196604	{CMS} 4-diphosphocytidyl-2C-methyl-D-erythritol synthase, putative chloroplast precursor |538.233735911792	Down	-3.01984
16.1.1.4	secondary metabolism.isoprenoids.non-mevalonate pathway.CMK	137673	{CMK} 4-diphosphocytidyl-2-C-methyl-D-erythritol kinase, putative chloroplast precursor |425.290516707649	Up	0.0432126
16.1.1.5	secondary metabolism.isoprenoids.non-mevalonate pathway.MCS	188593	{MCS} 2-C-methyl-D-erythritol 2,4-cyclodiphosphate synthase, putative chloroplast precursor |652.5	Down	-1.01635
16.1.1.6	secondary metabolism.isoprenoids.non-mevalonate pathway.HDS	55268	{HDS} 1-hydroxy-2-methyl-2-(E)-butenyl 4-diphosphate synthase, putative chloroplast precursor |1111.14582492053	Down	-0.404856
16.1.1.7	secondary metabolism.isoprenoids.non-mevalonate pathway.HDR	59822	{IDS} 4-hydroxy-3-methylbut-2-enyl diphosphate reductase, putative chloroplast precursor |444	Down	-1.54858
16.1.1.10	secondary metabolism.isoprenoids.non-mevalonate pathway.geranylgeranyl pyrophosphate synthase	195038	{GGPS} geranylgeranyl diphosphate synthase, putative chloroplast precursor |1485.05680985681	Up	0.707872
16.1.2.2	secondary metabolism.isoprenoids.mevalonate pathway.HMG-CoA synthase	118594	no description |151	Up	0.755695
16.1.2.7	secondary metabolism.isoprenoids.mevalonate pathway.isopentenyl pyrophosphate:dimethyllallyl pyrophosphate isomerase	24471	{IDI} isopentenyl-diphosphate delta-isomerase, putative chloroplast precursor |603.850732591482	Down	-0.659627
16.1.2.8	secondary metabolism.isoprenoids.mevalonate pathway.geranyl diphosphate synthase	135421	{GPPS} geranyl diphosphate synthase, putative chloroplast precursor |335.333333333333	Down	-1.40344
16.1.2.9	secondary metabolism.isoprenoids.mevalonate pathway.farnesyl pyrophosphate synthetase	137019	{FPPS} farnesyl diphosphate synthase, putative |1035.33333333333	Down	-0.641226
16.1.3.3	secondary metabolism.isoprenoids.tocopherol biosynthesis.MPBQ/MSBQ methyltransferase	129760	{VTE3} |	Down	-0.355628
16.1.3.4	secondary metabolism.isoprenoids.tocopherol biosynthesis.tocopherol cyclase	101649	no description |523	Up	0.788965
16.1.3.5	secondary metabolism.isoprenoids.tocopherol biosynthesis.tocopherol methyltransferase	129990	{VTE4} |332	Down	-1.84896
16.1.4	secondary metabolism.isoprenoids.carotenoids	182457	{ZDS} zeta-carotene desaturase, putative chloroplast precursor |1472.5	Up	0.198094
16.1.4	secondary metabolism.isoprenoids.carotenoids	164400	{CHYB} beta-carotene hydroxylase, putative chloroplast precursor; PMID:15849308 |364	Down	-2.46811
16.1.4	secondary metabolism.isoprenoids.carotenoids	130438	no description |802.571531673893	Down	-0.246993
16.1.4	secondary metabolism.isoprenoids.carotenoids	196597	{CRTISO} carotenoid isomerase, putative chloroplast precursor |1325.99941377745	Down	-0.0980057
16.1.4.1	secondary metabolism.isoprenoids.carotenoids.phytoene synthase	59715	{PSY,PSY1} phytoene synthase, putative chloroplast precursor |1132.75	Down	-0.727629
16.1.4.2	secondary metabolism.isoprenoids.carotenoids.phytoene dehydrogenase	78128	{PDS} phytoene desaturase, putative chloroplast precursor |2031.525	Up	0.544265
16.1.4.4	secondary metabolism.isoprenoids.carotenoids.lycopene epsilon cyclase	187094	{LCYE} lycopene epsilon cyclase, putative chloroplast precursor |341|332.75	Down	-0.0830297
16.1.4.5	secondary metabolism.isoprenoids.carotenoids.lycopene beta cyclase	187094	{LCYE} lycopene epsilon cyclase, putative chloroplast precursor |341|332.75	Down	-0.0830297
16.1.4.21	secondary metabolism.isoprenoids.carotenoids.violaxanthin de-epoxidase	195571	{VDR1} violaxanthin de-epoxidase related, chloroplast |	Up	1.12602
16.1.5	secondary metabolism.isoprenoids.terpenoids	196409	{CAS} cycloartenol synthase |1159.22594905095|1163	Up	1.03515
16.1.5	secondary metabolism.isoprenoids.terpenoids	182663	{SPPS} solanesyl diphosphate synthase, putative chloroplast precursor |392	Down	-0.969703
13.1.2.3	amino acid metabolism.synthesis.glutamate family.arginine	58140	{AGS1} arginosuccinate synthase |946.217507450303	Up	0.694043
13.1.2.3	amino acid metabolism.synthesis.glutamate family.arginine	101662	{ARG7} Argininosuccinate lyase |658.5	Down	-1.09945
13.1.2.3	amino acid metabolism.synthesis.glutamate family.arginine	188762	{OTC1} |844.821802437796	Up	0.774658
13.1.2.3.2	amino acid metabolism.synthesis.glutamate family.arginine.acetylglutamate kinase	78991	Acetylglutamate kinase-like protein, chloroplast precursor |327|327	Down	-0.553315
13.1.2.3.4	amino acid metabolism.synthesis.glutamate family.arginine.acetylornithine aminotransferase	139007	{ARG9} acetylornithine aminotransferase |464	Up	0.00224296
13.1.2.3.11	amino acid metabolism.synthesis.glutamate family.arginine.carbamoyl-phosphate synthase	128227	no description |525|525	Up	0.84879
13.1.3.4	amino acid metabolism.synthesis.aspartate family.methionine	196483	{METC} cystathionine beta-lyase |957.510755571935	Up	0.237111
13.1.3.4	amino acid metabolism.synthesis.aspartate family.methionine	76715	{METH} Vitamin B12 (cobalamin) dependent methionine synthase |926.71036167634	Down	-0.350296
13.1.3.4	amino acid metabolism.synthesis.aspartate family.methionine	154307	{METE} Vitamin B12 (cobalamin) independent methionine synthase |2619.42805141356	Down	-1.6602
13.1.3.4	amino acid metabolism.synthesis.aspartate family.methionine	182408	{METM} S-Adenosylmethionine synthetase |3409.16690050146	Up	0.0579979
13.1.3.4.2	amino acid metabolism.synthesis.aspartate family.methionine.cystathionine beta-lyase	24268	{CGS1} cystathionine gamma-synthase |562.666666666667	Down	-1.49569
13.1.3.5	amino acid metabolism.synthesis.aspartate family.lysine	126518	{DPS1} dihydrodipicolinate synthase |1300.5191253236	Down	-0.743858
13.1.3.5.3	amino acid metabolism.synthesis.aspartate family.lysine.LL-diaminopimelic acid aminotransferase	129557	{ATR1} aminotransferase, putative |538	Up	0.255497
13.1.3.5.4	amino acid metabolism.synthesis.aspartate family.lysine.diaminopimelate epimerase	150957	{DPE1} diaminopimelate (DAP) epimerase, putative |398	Down	-0.0407912
13.1.3.5.5	amino acid metabolism.synthesis.aspartate family.lysine.diaminopimelate decarboxylase	146886	{DPD1} diaminopimelate (DAP) decarboxylase, putative |794	Up	0.148739
13.1.3.6.1.1	amino acid metabolism.synthesis.aspartate family.misc.homoserine.aspartate kinase	161455	{ASK1} aspartate kinase, monofunctional, putative |965.016666666667	Up	0.539669
13.1.3.6.1.2	amino acid metabolism.synthesis.aspartate family.misc.homoserine.aspartate semialdehyde dehydrogenase	148810	{ASSD} |869.58610385887	Up	1.04403
13.1.3.6.1.10	amino acid metabolism.synthesis.aspartate family.misc.homoserine.bifunctional aspartate kinase/homoserine dehydrogenase	196320	{HSD1} homoserine dehydrogenase, putative |635.75	Down	-0.111243
13.1.4.1	amino acid metabolism.synthesis.branched chain group.common	140839	{AAI1} acetohydroxy acid isomeroreductase |1613	Up	1.53146
13.1.4.1	amino acid metabolism.synthesis.branched chain group.common	187392	{BCA2} branched-chain amino acid aminotransferase, putative |634.447619047619	Down	-0.324753
13.1.4.1	amino acid metabolism.synthesis.branched chain group.common	5137	{ALSS1} acetolactate synthase, small subunit |453	Down	-0.102804
13.1.4.1	amino acid metabolism.synthesis.branched chain group.common	138180	{ALSL1} acetolactate synthase, large subunit |2760.09345238095	Down	-0.19863
13.1.5.1.1	amino acid metabolism.synthesis.serine-glycine-cysteine group.serine.phosphoglycerate dehydrogenase	78757	{PGD1} D-3-phosphoglycerate dehydrogenase |804.542424242424	Down	-0.69503
13.1.5.1.2	amino acid metabolism.synthesis.serine-glycine-cysteine group.serine.phosphoserine aminotransferase	188476	{PST1} phosphoserine aminotransferase |926.5	Up	0.919083
13.1.5.3	amino acid metabolism.synthesis.serine-glycine-cysteine group.cysteine	191269	{NIFS1,NFS1} cysteine desulfurase, mitochondrial precursor |573	Down	-0.455161
13.1.5.3	amino acid metabolism.synthesis.serine-glycine-cysteine group.cysteine	167884	{NIFS2} cysteine desulfurase |63.9	Down	-0.643919
13.1.5.3.1	amino acid metabolism.synthesis.serine-glycine-cysteine group.cysteine.OASTL	196485	{OASTL2} cysteine synthase |994.149875124875	Up	1.47371
13.1.6.1.1	amino acid metabolism.synthesis.aromatic aa.chorismate.3-deoxy-D-arabino-heptulosonate 7-phosphate synthase	192517	{SHKA1} 3-deoxy-D-arabino-heptulosonate 7-phosphate synthetase |2699.13222499083	Down	-0.110636
13.1.6.1.2	amino acid metabolism.synthesis.aromatic aa.chorismate.3-dehydroquinate synthase	196549	{DHQS} 3-dehydroquinate synthase |918.892873791716	Up	0.279556
13.1.6.1.5	amino acid metabolism.synthesis.aromatic aa.chorismate.shikimate kinase	196593	{SHKF1} possible shikimate kinase |342.016618382973	Down	-0.609599
13.1.6.1.6	amino acid metabolism.synthesis.aromatic aa.chorismate.5-enolpyruvylshikimate-3-phosphate synthase	133088	{SHKG1} 5-enolpyruvylshikimate-3-phosphate (EPSP) synthase |2167.74929949489	Up	0.80751
13.1.6.1.7	amino acid metabolism.synthesis.aromatic aa.chorismate.chorismate synthase	191993	{SHKH1} chorismate synthase, putative |1230.55033348532	Up	0.106586
13.1.6.5.1	amino acid metabolism.synthesis.aromatic aa.tryptophan.anthranilate synthase	79042	{ASB1} |1069	Down	-1.01189
13.1.6.5.5	amino acid metabolism.synthesis.aromatic aa.tryptophan.tryptophan synthase	81238	{TSA} |538.75	Down	-0.267766
13.1.1.2	amino acid metabolism.synthesis.central amino acid metabolism.aspartate	174097	{AST1} aspartate aminotransferase |860.97619047619|890.625	Up	0.559991
13.1.1.2.1	amino acid metabolism.synthesis.central amino acid metabolism.aspartate.aspartate aminotransferase	174097	{AST1} aspartate aminotransferase |860.97619047619|890.625	Up	0.559991
13.1.1.2.1	amino acid metabolism.synthesis.central amino acid metabolism.aspartate.aspartate aminotransferase	186959	{AAT3} aspartate aminotransferase, putative |935.886904761905	Down	-0.0617585
13.1.1.2.1	amino acid metabolism.synthesis.central amino acid metabolism.aspartate.aspartate aminotransferase	126943	{AAT4} aspartate aminotransferase, putative |795.87619047619	Up	0.0172934
13.2.2.2	amino acid metabolism.degradation.glutamate family.proline	146649	putative proline oxidase |266.861522115917	Up	0.3361
13.2.2.2	amino acid metabolism.degradation.glutamate family.proline	138462	{PHX} prolyl 4-hydroxylase alpha-1 subunit precursor-like protein |717.128354978355|691.045021645022	Up	0.847479
13.2.2.2	amino acid metabolism.degradation.glutamate family.proline	150809	{ALD1} |722	Down	-0.672458
13.2.5.1	amino acid metabolism.degradation.serine-glycine-cysteine group.serine	128310	{HPR1} Hydroxypyruvate reductase |757.1625|725.9625|725.9625	Down	-0.765787
13.2.5.1	amino acid metabolism.degradation.serine-glycine-cysteine group.serine	196595	{THD1} threonine deaminase |480	Up	1.26209
13.2.5.2	amino acid metabolism.degradation.serine-glycine-cysteine group.glycine	128310	{HPR1} Hydroxypyruvate reductase |757.1625|725.9625|725.9625	Down	-0.765787
13.2.5.2	amino acid metabolism.degradation.serine-glycine-cysteine group.glycine	196242	{GCST} Glycine cleavage system, T protein |1763.25071612167	Down	-1.88755
13.2.5.2	amino acid metabolism.degradation.serine-glycine-cysteine group.glycine	136984	{GCSP} Glycine cleavage system, P protein |4527.9	Down	-0.872648
13.2.5.2	amino acid metabolism.degradation.serine-glycine-cysteine group.glycine	141056	Threonine aldolase family protein |341|341	Up	1.48451
12.2.1	not assigned	140487	{FGS1} Ferredoxin-dependent glutamate synthase, chloroplast precursor |4289.75314435862	Down	-0.153726
12.2.2	N-metabolism.ammonia metabolism.glutamine synthase	133971	{GLN1} glutamine synthetase, cytosolic |4364.93290366754	Up	1.60787
12.2.2	N-metabolism.ammonia metabolism.glutamine synthase	136895	{GLN3} glutamine synthetase, plastid precursor |	Down	-1.25053
12.1.1	N-metabolism.nitrate metabolism.NR	184661	{NIT1} nitrate reductase |5501.23416338563	Down	-1.60553
12.1.1	N-metabolism.nitrate metabolism.NR	59800	{SUOX} sulfite oxidase, mitochondrial precursor |922.473896395142	Up	0.362745
12.1.1	N-metabolism.nitrate metabolism.NR	163751	{CBR1} NADH-cytochrome b5 reductase |608.025859002968	Up	1.20063
12.1.2	N-metabolism.nitrate metabolism.nitrite reductase	192085	{Nii1} |1344.6	Down	-1.7975
23.4.1	nucleotide metabolism.phosphotransfer and pyrophosphatases.adenylate kinase	196741	{FAP42} Flagellar Associated Protein Similar to Adenylate/Guanylate Kinases |387.062494172494	Up	0.885257
23.4.1	nucleotide metabolism.phosphotransfer and pyrophosphatases.adenylate kinase	194134	{AK3} Adenylate Kinase Homolog 3 |667.039381988381	Up	0.662229
23.4.1	nucleotide metabolism.phosphotransfer and pyrophosphatases.adenylate kinase	118113	{AK6} Adenylate Kinase Homolog 6 |717.133115079365	Down	-1.78575
23.4.1	nucleotide metabolism.phosphotransfer and pyrophosphatases.adenylate kinase	194947	{FAK1} Flagellar Adenylate Kinase Homolog1 |50.1	Down	-1.28834
23.4.1	nucleotide metabolism.phosphotransfer and pyrophosphatases.adenylate kinase	133184	{AK4} Adenylate Kinase Homolog 2 |763.323452380952	Down	-1.35953
23.4.2	nucleotide metabolism.phosphotransfer and pyrophosphatases.guanylate kinase	111725	no description |	Down	-0.679523
23.4.3	nucleotide metabolism.phosphotransfer and pyrophosphatases.uridylate kinase	141571	no description |388.5	Up	0.996789
23.4.3	nucleotide metabolism.phosphotransfer and pyrophosphatases.uridylate kinase	114363	{AK2} Adenylate Kinase Homolog 2 |310.333333333333	Down	-0.786898
23.4.3	nucleotide metabolism.phosphotransfer and pyrophosphatases.uridylate kinase	129362	{FAK1} ODA5-associated flagellar adenylate kinase |326.666666666667	Up	0.525414
23.4.3	nucleotide metabolism.phosphotransfer and pyrophosphatases.uridylate kinase	103322	{AK5} Adenylate Kinase |271.333333333333	Up	1.21838
23.4.10	nucleotide metabolism.phosphotransfer and pyrophosphatases.nucleoside diphosphate kinase	180221	{FAP67} Flagellar Associated Protein |418.06984453047	Up	1.05741
23.4.10	nucleotide metabolism.phosphotransfer and pyrophosphatases.nucleoside diphosphate kinase	139197	{RSP23} Radial spoke protein 23 |476.474664502164	Down	-0.816727
23.4.10	nucleotide metabolism.phosphotransfer and pyrophosphatases.nucleoside diphosphate kinase	58944	{FAP103} Flagellar Associated Protein Similar to Nucleoside Diphosphate Kinase |1218.06927863803	Up	0.65118
23.4.99	nucleotide metabolism.phosphotransfer and pyrophosphatases.misc	78991	Acetylglutamate kinase-like protein, chloroplast precursor |327|327	Down	-0.553315
23.4.99	nucleotide metabolism.phosphotransfer and pyrophosphatases.misc	133620	{IPY1} |1034.1169047619	Down	-0.242756
23.4.99	nucleotide metabolism.phosphotransfer and pyrophosphatases.misc	174103	{IPY3} |1340.61071428571	Up	1.10642
23.1.2.3	nucleotide metabolism.synthesis.purine.GAR transformylase	117678	no description |612.5	Down	-2.09472
23.1.2.4	nucleotide metabolism.synthesis.purine.FGAR amidotransferase	131059	AIR synthase related protein |1509	Up	0.566395
23.1.2.5	nucleotide metabolism.synthesis.purine.AIR synthase	54374	no description |1136.55241957828	Down	-0.771958
23.1.2.6	nucleotide metabolism.synthesis.purine.AIR carboxylase	196726	{PUR6} Phosphoribosylaminoimidazole carboxylase, eukaryotic-type |882.86680227045	Down	-0.552064
23.1.2.9	nucleotide metabolism.synthesis.purine.AICAR transformylase and IMP synthase	116979	no description |445.174086267149	Down	-0.200146
23.1.2.31	nucleotide metabolism.synthesis.purine.GMP synthetase	126329	{GUA1} GMP synthetase |807.806466379353	Down	-0.340379
23.4.1	nucleotide metabolism.phosphotransfer and pyrophosphatases.adenylate kinase	196741	{FAP42} Flagellar Associated Protein Similar to Adenylate/Guanylate Kinases |387.062494172494	Up	0.885257
23.4.1	nucleotide metabolism.phosphotransfer and pyrophosphatases.adenylate kinase	194134	{AK3} Adenylate Kinase Homolog 3 |667.039381988381	Up	0.662229
23.4.1	nucleotide metabolism.phosphotransfer and pyrophosphatases.adenylate kinase	118113	{AK6} Adenylate Kinase Homolog 6 |717.133115079365	Down	-1.78575
23.4.1	nucleotide metabolism.phosphotransfer and pyrophosphatases.adenylate kinase	194947	{FAK1} Flagellar Adenylate Kinase Homolog1 |50.1	Down	-1.28834
23.4.1	nucleotide metabolism.phosphotransfer and pyrophosphatases.adenylate kinase	133184	{AK4} Adenylate Kinase Homolog 2 |763.323452380952	Down	-1.35953
23.4.2	nucleotide metabolism.phosphotransfer and pyrophosphatases.guanylate kinase	111725	no description |	Down	-0.679523
23.4.3	nucleotide metabolism.phosphotransfer and pyrophosphatases.uridylate kinase	141571	no description |388.5	Up	0.996789
23.4.3	nucleotide metabolism.phosphotransfer and pyrophosphatases.uridylate kinase	114363	{AK2} Adenylate Kinase Homolog 2 |310.333333333333	Down	-0.786898
23.4.3	nucleotide metabolism.phosphotransfer and pyrophosphatases.uridylate kinase	129362	{FAK1} ODA5-associated flagellar adenylate kinase |326.666666666667	Up	0.525414
23.4.3	nucleotide metabolism.phosphotransfer and pyrophosphatases.uridylate kinase	103322	{AK5} Adenylate Kinase |271.333333333333	Up	1.21838
23.4.10	nucleotide metabolism.phosphotransfer and pyrophosphatases.nucleoside diphosphate kinase	180221	{FAP67} Flagellar Associated Protein |418.06984453047	Up	1.05741
23.4.10	nucleotide metabolism.phosphotransfer and pyrophosphatases.nucleoside diphosphate kinase	139197	{RSP23} Radial spoke protein 23 |476.474664502164	Down	-0.816727
23.4.10	nucleotide metabolism.phosphotransfer and pyrophosphatases.nucleoside diphosphate kinase	58944	{FAP103} Flagellar Associated Protein Similar to Nucleoside Diphosphate Kinase |1218.06927863803	Up	0.65118
23.4.99	nucleotide metabolism.phosphotransfer and pyrophosphatases.misc	78991	Acetylglutamate kinase-like protein, chloroplast precursor |327|327	Down	-0.553315
23.4.99	nucleotide metabolism.phosphotransfer and pyrophosphatases.misc	133620	{IPY1} |1034.1169047619	Down	-0.242756
23.4.99	nucleotide metabolism.phosphotransfer and pyrophosphatases.misc	174103	{IPY3} |1340.61071428571	Up	1.10642
23.5.2	nucleotide metabolism.deoxynucleotide metabolism.pseudouridine synthase	96859	{PUS3} RNA pseudourine synthase, mitochondrial precursor, putative |385.313333333333|385.313333333333	Up	0.315685
23.5.2	nucleotide metabolism.deoxynucleotide metabolism.pseudouridine synthase	96831	{PUS4} tRNA pseudouridine synthase, mitochondrial precursor, putative |287.6|268.2	Up	1.06421
23.5.2	nucleotide metabolism.deoxynucleotide metabolism.pseudouridine synthase	151084	{PUS1} tRNA pseudouridine synthase, mitochondrial precursor, putative |129.75|129.75	Up	0.396578
23.5.4	nucleotide metabolism.deoxynucleotide metabolism.ribonucleoside-diphosphate reductase	185583	{RIR1} ribonucleoside-diphosphate reductase large subunit |1216	Up	0.570605
23.5.4	nucleotide metabolism.deoxynucleotide metabolism.ribonucleoside-diphosphate reductase	144621	{RIR2B} ribonucleoside-diphosphate reductase small subunit |1125.5	Up	0.508984

## Sheet: Table S2
Table S2: Metabolism overview and expression status of differntially expressed genes in PRJNA295823 , Fold change: treated vs untreated
BinCode	BinName	id	description	Fold change
3.5	minor CHO metabolism.others	115347	no description |258.242857142857	-1.99548
3.5	minor CHO metabolism.others	158244	{LCI28} low-CO2-induced putative aldose reductase. |647.879761904762	-2.89513
3.5	minor CHO metabolism.others	147383	no description |193.661111111111	2.452
3.5	minor CHO metabolism.others	111372	PfkB-type carbohydrate kinase family protein, ribokinase |246	-1.1061
3.5	minor CHO metabolism.others	169453	no description |125.1	0.834792
3.5	minor CHO metabolism.others	187168	{AEP} Aldose-1-epimerase |732.114374293281	-0.907787
3.5	minor CHO metabolism.others	97880	no description |373.645238095238	-1.93951
3.5	minor CHO metabolism.others	144222	{COG8} Component of oligomeric golgi complex 8 |340	0.65235
3.5	minor CHO metabolism.others	190792	{RSP5} Radial spoke protein 5 |94.4	-4.11766
10.1	cell wall.precursor synthesis	152568	no description |91.7	3.2524
10.1.1.1	cell wall.precursor synthesis.NDP sugar pyrophosphorylase.GDP mannose	130417	{GMP1} GDP-D-mannose pyrophosphorylase |889.666666666667	-2.14951
10.1.1.20	cell wall.precursor synthesis.NDP sugar pyrophosphorylase.multiple NDP-Sugars	32796	{UAP2} UDP-N-acetylglucosamine-pyrophosphorylase like protein |410	-1.16351
10.1.4	cell wall.precursor synthesis.UGD	185081	{UGD2} UDP-glucose dehydrogenase |2290.35	0.558763
10.1.5	cell wall.precursor synthesis.UXS	135101	{GAD1} UDP-D-glucuronic acid decarboxylase |1179.86666666667	0.228716
10.1.6	cell wall.precursor synthesis.GAE	151368	{NDE2} NAD-dependent epimerase/dehydratase |879.583333333333	-3.38747
10.1.10	cell wall.precursor synthesis.RHM	158152	no description |430.333333333333|419	-2.32257
10.1.10	cell wall.precursor synthesis.RHM	111778	no description |814.166666666667	-2.70378
10.1.11	cell wall.precursor synthesis.UER	158152	no description |430.333333333333|419	-2.32257
10.1.20	cell wall.precursor synthesis.phosphomannose isomerase	196572	{MPI} mannose-6-phosphate isomerase like |375	3.1729
2.1.2.1	major CHO metabolism.synthesis.starch.AGPase	136037	{STA6 } ADP-glucose pyrophosphorylase small subunit |3220.97731712984	-2.11504
2.1.2.2	major CHO metabolism.synthesis.starch.starch synthase	185710	soluble starch synthase, ADP-glucose alpha-1,4 glucane alpha-4-glucanotransferase |1369.10480302721	-1.8838
2.1.2.2	major CHO metabolism.synthesis.starch.starch synthase	503	{STA2} Putative granule-bound starch synthase I |2546.20204501325	-1.91994
2.1.2.2	major CHO metabolism.synthesis.starch.starch synthase	191662	{STA3} soluble starch synthase III , ADP-glucose alpha-1,4 glucane alpha-4-glucanotransferase |1545.52054535248	-4.41915
2.1.2.3	major CHO metabolism.synthesis.starch.starch branching	118976	{Starch Branching Enzyme} Starch Branching Enzyme |2598.53333333333	-0.936594
2.1.2.3	major CHO metabolism.synthesis.starch.starch branching	94079	{Starch Branching Enzyme} Starch Branching Enzyme |2393.84166666667	-2.12462
2.1.2.4	major CHO metabolism.synthesis.starch.debranching	132067	isoamylase, starch debranching enzyme |1080.05833333333	-1.61526
2.1.2.5	major CHO metabolism.synthesis.starch.transporter	196520	{ANT1} ANT1 Adenine Nucleotide Translocator 1, mitochondrial |1946.37936507937	-0.704306
2.2.2.1	major CHO metabolism.degradation.starch.starch cleavage	128630	{GLH1} glycoside-hydrolase-like protein |1400.78015873016|1400.78015873016	0.433952
2.2.2.1	major CHO metabolism.degradation.starch.starch cleavage	112511	{beta-amylase} beta-amylase |1358.53622375137	0.0967158
2.2.2.1	major CHO metabolism.degradation.starch.starch cleavage	129211	beta-amylase |1325.83720005299	-2.49754
2.2.2.1	major CHO metabolism.degradation.starch.starch cleavage	58178	{alpha-amylase} alpha-amylase |1742.14436396936	-0.785322
2.2.2.3	major CHO metabolism.degradation.starch.glucan water dikinase	192398	no description |1014.445	-0.956762
2.2.2.4	major CHO metabolism.degradation.starch.D enzyme	122203	no description |999.81908127401	-2.00277
2.2.2.4	major CHO metabolism.degradation.starch.D enzyme	140452	{STA11 } 4-alpha-glucanotransferase |1064.51870473098	-0.813332
21.2	redox.ascorbate and glutathione	139735	{MDAR} monodehydroascorbate reductase |915	-1.06497
21.2	redox.ascorbate and glutathione	131692	{CYB5_1} |326.808712121212	-0.340786
21.2	redox.ascorbate and glutathione	149810	no description |126	-0.611988
21.2.1	redox.ascorbate and glutathione.ascorbate	146799	no description |174.675	-1.16993
21.2.1	redox.ascorbate and glutathione.ascorbate	186597	{APX1} ascorbate peroxidase |1281.90281723108	-0.827293
21.2.1	redox.ascorbate and glutathione.ascorbate	143082	{DHAR} dehydroascorbate reductase |286.806666666667	-3.50104
21.2.2	redox.ascorbate and glutathione.glutathione	188373	{GPX4} Glutathione peroxidase, possibly chloroplastic |703.902930460401	-0.581101
21.2.2	redox.ascorbate and glutathione.glutathione	134165	{GSHR1} glutathione reductase |1946.49404761905	-3.23343
21.2.2	redox.ascorbate and glutathione.glutathione	181975	{GSH1} |1676.62752821131	-2.9673
1.1.1.1	PS.lightreaction.photosystem II.LHC-II	98563	no description |394.364782714705|411.088137566138	-3.20591
1.1.1.1	PS.lightreaction.photosystem II.LHC-II	184810	{Lhcb4} |1225.13066192216	-4.14904
1.1.1.2	PS.lightreaction.photosystem II.PSII polypeptide subunits	127879	no description |155	-3.70743
1.1.1.2	PS.lightreaction.photosystem II.PSII polypeptide subunits	187371	no description |96.3	-2.47838
1.1.1.2	PS.lightreaction.photosystem II.PSII polypeptide subunits	155150	{PSBW} Photosystem II subunit W, chloroplast precursor |392.25	-0.663265
1.1.1.2	PS.lightreaction.photosystem II.PSII polypeptide subunits	187308	{OHP1} low CO2 and stress-induced one-helix protein |100	-1.67778
1.1.1.2	PS.lightreaction.photosystem II.PSII polypeptide subunits	153656	{OEE3} oxygen-evolving enhancer protein 3, chloroplast precursor, (PSBQ) |631.199339936184	-6.29739
1.1.1.2	PS.lightreaction.photosystem II.PSII polypeptide subunits	196341	{PSBS} chloroplast PsbS |301	-2.7628
1.1.1.2	PS.lightreaction.photosystem II.PSII polypeptide subunits	130316	{PSBO} Oxygen-evolving enhancer protein 1 of photosystem II |1730.18865003427	0.585954
1.1.2.1	PS.lightreaction.photosystem I.LHC-I	98563	no description |394.364782714705|411.088137566138	-4.97172
1.1.2.1	PS.lightreaction.photosystem I.LHC-I	153678	{LHCA3} light-harvesting chlorophyll-a/b protein of photosystem I (Type III) |527.077521008403	-4.80311
1.1.2.2	PS.lightreaction.photosystem I.PSI polypeptide subunits	76146	{PSAE} |338.8125	-0.224682
1.1.2.2	PS.lightreaction.photosystem I.PSI polypeptide subunits	182959	no description |533.579054877507	-1.60681
1.1.2.2	PS.lightreaction.photosystem I.PSI polypeptide subunits	193847	{PSAO } Photosystem I subunit O |91.3	-3.05082
1.1.2.2	PS.lightreaction.photosystem I.PSI polypeptide subunits	130914	{PSAF} photosystem I reaction center subunit III, chloroplast precursor |919.660633253035	1.78215
1.1.2.2	PS.lightreaction.photosystem I.PSI polypeptide subunits	165416	{PSAG} photosystem I reaction center subunit V, chloroplast precursor |329.011764764664	-5.63834
1.1.4	PS.lightreaction.ATP synthase	132678	{ATPD} ATP synthase delta chain, chloroplast precursor |836.291666666667	-1.9369
1.1.4	PS.lightreaction.ATP synthase	134235	{ATPC} ATP synthase gamma chain, chloroplast precursor |1653.25	-0.89633
1.1.5.1	PS.lightreaction.other electron carrier (ox/red).plastocyanin	185915	{PCY1} plastocyanin, chloroplast precursor |871.739590518136	-1.2678
1.1.5.2	PS.lightreaction.other electron carrier (ox/red).ferredoxin	196705	{FDX4} Apoferredoxin, chloroplast precursor |208.689458293731	-1.48714
1.1.5.2	PS.lightreaction.other electron carrier (ox/red).ferredoxin	174881	possible 2Fe-2S ferredoxin |118.2	-0.639289
1.1.5.2	PS.lightreaction.other electron carrier (ox/red).ferredoxin	196707	{FDX3} Apoferredoxin, chloroplast precursor |335.042155263038	-3.98595
1.1.5.2	PS.lightreaction.other electron carrier (ox/red).ferredoxin	147787	{PETF} Apoferredoxin, chloroplast precursor |958.108606589489	-3.3717
1.1.5.2	PS.lightreaction.other electron carrier (ox/red).ferredoxin	196703	{FDX6} Apoferredoxin, chloroplast precursor |258.725633383224	-1.65603
1.1.5.3	PS.lightreaction.other electron carrier (ox/red).ferredoxin reductase	134840	{ARH1} NADP adrenodoxin-like ferredoxin reductase |362	0.135474
1.1.6	PS.lightreaction.NADH DH	182980	{NUO9 } NADH:ubiquinone oxidoreductase (Complex I) ND9 subunit, mitochondrial |232.142277722278	0.380152
1.1.30	PS.lightreaction.state transition	194793	{STT7} protein kinase involved in state transitions |1934.33333333333	-0.639289
1.1.30	PS.lightreaction.state transition	154569	{STL1} Serine/threonine protein kinase, active site, Stl1 (Q84V17_CHLRE) |426.5|473.77529961882	-1.8838
1.1.40	PS.lightreaction.cyclic electron flow-chlororespiration	185013	{NUO7 } NADH:ubiquinone oxidoreductase (Complex I) ND7 subunit, mitochondrial |1339.46529279544	0.276297
1.1.40	PS.lightreaction.cyclic electron flow-chlororespiration	189624	{PTOX1} alternative oxidase, possibly chloroplast-localized |235	0.219684
1.1.40	PS.lightreaction.cyclic electron flow-chlororespiration	132909	{NUO8 } NADH:ubiquinone oxidoreductase (Complex I) subunit, homolog to bovine TYKY subunit, mitochondrial |591.181939053593|562	-0.785283
1.3.2	PS.calvin cyle.rubisco small subunit	82986	{RBCS1} ribulose-1,5-bisphosphate carboxylase/oxygenase small subunit 1, chloroplast precursor |1851.82989553062	-1.47583
1.3.3	PS.calvin cyle.phosphoglycerate kinase	132210	{PGK1} Phosphoglycerate Kinase |2493.95	-4.73655
1.3.4	PS.calvin cyle.GAP	129019	{GAP3} Glyceraldehyde-3-Phosphate Dehydrogenase |2253.94480519481	-0.291298
1.3.4	PS.calvin cyle.GAP	102889	{GAPN1} Glyceraldehyde 3-phosphate dehydrogenase, nonphosphorylating |2046.5	-1.22359
1.3.5	PS.calvin cycle.TPI	26265	{TPIC} triose phosphate isomerase (TIM), chloroplast precursor |896.666666666667	0.626646
1.3.6	PS.calvin cyle.aldolase	24459	no description |2143.72777777778	-2.7628
1.3.7	PS.calvin cyle.FBPase	24084	{FBP} Fructose-1,6-bisphosphatase, plastid precursor |1818	-1.8951
1.3.8	PS.calvin cyle.transketolase	141319	{TRK} Transketolase, plastid precursor |2676.15	-1.03481
1.3.9	PS.calvin cyle.seduheptulose bisphosphatase	189186	{SBP1} sedoheptulose-1,7-bisphosphatase |1767.125	-2.07856
1.3.11	PS.calvin cyle.RPE	135614	{RPE1} Ribulose phosphate-3-epimerase, chloroplast precursor |666.142139620753	-1.95336
1.3.12	PS.calvin cyle.PRK	195910	{PRK} Phosphoribulokinase, chloroplast precursor |2429.25	0.761712
1.3.13	PS.calvin cyle.rubisco interacting	150261	{PMT} protein N-methyltransferase |142.65	-3.84791
1.3.13	PS.calvin cyle.rubisco interacting	193086	no description |453	-2.71315
1.3.13	PS.calvin cyle.rubisco interacting	128745	{RCA} rubisco activase |3314.74356060606	-2.12542
1.3.13	PS.calvin cyle.rubisco interacting	150732	no description |136.68	-0.639289
1.2.1	PS.photorespiration.phosphoglycolate phosphatase	142105	{PGP3} Phosphoglycolate phosphatase, chloroplast precursor |591.554681163532	-0.794607
1.2.1	PS.photorespiration.phosphoglycolate phosphatase	127857	{PGP2} Phosphoglycolate phosphatase, chloroplast precursor |393.39588108745	-2.646
1.2.1	PS.photorespiration.phosphoglycolate phosphatase	196298	{PGP1} phosphoglycolate phosphatase 1 |806	-3.50104
1.2.2	PS.photorespiration.glycolate oxydase	127775	{GOX} Glycolate oxidase |836	-3.60241
1.2.3	PS.aminotransferases peroxisomal	194541	{AGT1} alanine-glyoxylate transaminase, putative |135|135	-1.41652
1.2.3	PS.aminotransferases peroxisomal	194609	{SGA1} Putative serine glyoxylate aminotransferase, variant SGA1a |398|398	-1.99548
1.2.4	PS.photorespiration.glycine cleavage	196067	{GCSH} glycine cleavage system, H-protein |632.429801916239	-3.49444
1.2.5	PS.photorespiration.serine hydroxymethyltransferase	196400	{SHMT3} serine hydroxymethyltransferase 3 |2962.10780920636	-0.127564
1.2.5	PS.photorespiration.serine hydroxymethyltransferase	196354	{SHMT2} serine hydroxymethyltranferase 2 |2880.26084170815	-2.90272
1.2.5	PS.photorespiration.serine hydroxymethyltransferase	194461	{SHMT1} Serine hydroxymethyltransferase |3377.14404761905	-1.70622
1.2.6	PS.photorespiration.hydroxypyruvate reductase	128310	{HPR1} Hydroxypyruvate reductase |757.1625|725.9625|725.9625	-2.90775
1.2.7	PS.photorespiration.glycerate kinase	196366	{GLYK} glycerate kinase |192	-0.956757
19.1	tetrapyrrole synthesis.glu-tRNA synthetase	135584	{CHLI2 } CHLI Magnesium chelatase subunit I, chloroplast precursor |1379.64642857143	-2.10752
19.1	tetrapyrrole synthesis.glu-tRNA synthetase	188401	{GAT1} Glutamyl tRNA amidotransferase, subunit A |410	0.975864
19.1	tetrapyrrole synthesis.glu-tRNA synthetase	195543	{GTS1 } Gln-Glu (Glx) non discriminatory tRNA synthetase, chloroplast precursor |661.16|704.51	-2.2019
19.1	tetrapyrrole synthesis.glu-tRNA synthetase	134594	{CHLD } Magnesium chelatase subunit D, chloroplast precursor |1962.64404761905	0.996202
19.2	tetrapyrrole synthesis.glu-tRNA reductase	183460	{HEMA} Glutamyl-tRNA reductase, chloroplast precursor |2370.69126158217	-4.21459
19.2	tetrapyrrole synthesis.glu-tRNA reductase	183446	{HEM15 } Ferrochelatase, chloroplast precursor |778.8	-1.78812
19.3	tetrapyrrole synthesis.GSA	138524	{GSA } Glutamate-1-semialdehyde aminotransferase, chloroplast precursor |2933.02857142857	-4.12532
19.4	tetrapyrrole synthesis.ALA dehydratase	186639	{ALAD ,ALAD} Delta-aminolevulinic acid dehydratase, chloroplast precursor |2251.94369230574	-3.7421
19.5	tetrapyrrole synthesis.porphobilinogen deaminase	194475	{PBGD1} Porphobilinogen deaminase, putative chloroplast precursor |1068.59288744443	-3.60568
19.6	tetrapyrrole synthesis.uroporphyrinogen III synthase	195943	{UROS} Uroporphyrinogen-III synthase, putative chloroplast precursor |259.251209461613	-1.27447
19.7	tetrapyrrole synthesis.uroporphyrinogen decarboxylase	132194	{UROD1} Uroporphyrinogen-III decarboxylase, chloroplast precursor |1674.84288975886	-3.86102
19.7	tetrapyrrole synthesis.uroporphyrinogen decarboxylase	195818	{UROD3} Uroporphyrinogen decarboxylase |1330.69658266168	-2.96293
19.8	tetrapyrrole synthesis.coproporphyrinogen III oxidase	53583	{CPX1} Coproporphyrinogen III oxidase, chloroplast precursor |1314.35	-1.85472
19.9	tetrapyrrole synthesis.protoporphyrin IX oxidase	191043	{PPO} Protoporphyrinogen oxidase, chloroplast precursor |1170.85	-4.18614
19.10	tetrapyrrole synthesis.magnesium chelatase	195524	{CHLH1} CHLH Magnesium chelatase subunit H, chloroplast precursor |1795	-1.85278
19.11	tetrapyrrole synthesis.magnesium protoporphyrin IX methyltransferase	195575	{CHLM} Magnesium protoporphrin IX S-adenosyl methionine O-methyl transferase, chloroplast precursor |307	-2.06753
19.13	tetrapyrrole synthesis.divinyl chlorophyllide-a 8-vinyl-reductase	195952	{DVR} 3,8-divinyl protochlorophyllide a 8-vinyl reductase, chloroplast precursor |419	-2.41226
19.15	tetrapyrrole synthesis.chlorophyll synthase	5437	{CHS,CHLG} Chlorophyll synthetase, chloroplast precursor |421	-3.82578
19.16	tetrapyrrole synthesis.chlorophyll b synthase	195951	{CAO} Chlorophyll a oxygenase, chloroplast precursor |417	-2.7453
19.21	tetrapyrrole synthesis.heme oxygenase	195947	{HMOX1} Heme oxygenase |292.933333333333	-1.19091
19.30	tetrapyrrole synthesis.urogen III methylase	191432	{COB1} S-adenosyl-L-methionine-dependent uroporphyrinogen III methyltransferase |563.541527832149	-1.83055
19.40	tetrapyrrole synthesis.regulation	127367	{FLU} FLU chloroplast precursor |90.5	-3.85153
19.99	tetrapyrrole synthesis.unspecified	123320	{COX10 } cytochrome c oxidase assembly protein, heme A: farnesyltransferase |505.221712385125	1.94122
9.1.2	mitochondrial electron transport / ATP synthesis.NADH-DH.localisation not clear	193762	{NUO13 } NADH:ubiquinone oxidoreductase (Complex I) 18 kDa subunit, homolog to bovine B17.2 subunit, mitochondrial |80.1	2.41167
9.1.2	mitochondrial electron transport / ATP synthesis.NADH-DH.localisation not clear	186185	{NUOA9 } NADH:ubiquinone oxidoreductase (Complex I) subunit, homolog to bovine 39 kD subunit, mitochondrial |224	-1.38432
9.1.2	mitochondrial electron transport / ATP synthesis.NADH-DH.localisation not clear	127317	{NUO5 } NADH:ubiquinone oxidoreductase (Complex I) 24 kDa subunit, homolog to bovine 24 kD subunit, mitochondrial |271	-1.71667
9.1.2	mitochondrial electron transport / ATP synthesis.NADH-DH.localisation not clear	79362	{NUOS1} NADH:ubiquinone oxidoreductase 76 kD protein (Complex I 78 kD subunit), mitochondrial |724	-2.96229
9.1.2	mitochondrial electron transport / ATP synthesis.NADH-DH.localisation not clear	132909	{NUO8 } NADH:ubiquinone oxidoreductase (Complex I) subunit, homolog to bovine TYKY subunit, mitochondrial |591.181939053593|562	-0.785283
9.1.2	mitochondrial electron transport / ATP synthesis.NADH-DH.localisation not clear	186342	{NUO6 } NADH:ubiquinone oxidoreductase (Complex I) subunit, homolog to bovine 51 kD subunit, mitochondrial |745	-1.61972
9.2.1	mitochondrial electron transport / ATP synthesis.NADH-DH.type II.internal matrix	195719	{NDA1} putative mitochondrial type-II NADH dehydrogenase. |557	-1.42417
9.2.2	mitochondrial electron transport / ATP synthesis.NADH-DH.type II.external	133334	{NDA2} putative type-II calcium-dependant NADH dehydrogenase, mitochondrial |708.916666666667	-0.417804
9.3	mitochondrial electron transport / ATP synthesis.electron transfer flavoprotein	180281	{ETFB } putative electron transfer flavoprotein beta-subunit , mitochondrial |218	-1.04777
9.3	mitochondrial electron transport / ATP synthesis.electron transfer flavoprotein	111715	{FUO1} Putative electron transfer flavoprotein-ubiquinone oxidoreductase. |796.359698224963	-0.579555
9.3	mitochondrial electron transport / ATP synthesis.electron transfer flavoprotein	189344	{ETFA } putative electron transfer flavoprotein alpha-subunit , mitochondrial |253	-0.441992
9.4	mitochondrial electron transport / ATP synthesis.alternative oxidase	129968	{AOX1} |790.038690476191	-1.25696
9.5	mitochondrial electron transport / ATP synthesis.cytochrome c reductase	77031	{QCR7 } Ubiquinol:cytochrome c oxidoredutase (Complex III) 14 kDa subunit subunit |192.6	-1.42417
9.5	mitochondrial electron transport / ATP synthesis.cytochrome c reductase	129128	{RIP1} Rieske iron-sulfur protein of mitochondrial ubiquinol-cytochrome c reductase. |1137.55847885598	-1.92388
9.6	mitochondrial electron transport / ATP synthesis.cytochrome c	133395	{CYC1} ubiquinol:cytochrome c oxidoreductase cytochrome c1, mitochondrial |910.083333333333	-2.60705
9.6	mitochondrial electron transport / ATP synthesis.cytochrome c	195343	{CCS1} c-type cytochrome synthesis 1 |344	-0.907787
9.7	mitochondrial electron transport / ATP synthesis.cytochrome c oxidase	56014	{COX3} Cytochrome c oxidase subunit III |254	-0.172943
9.7	mitochondrial electron transport / ATP synthesis.cytochrome c oxidase	159985	{SCO1} Putative cytochrome c oxidase assembly factor SCO1, mitochondrial |276	-2.0243
9.7	mitochondrial electron transport / ATP synthesis.cytochrome c oxidase	190125	{COX2b} Cytochrome c oxidase subunit II, protein IIb of split subunit. |709.712015868338	-2.06191
9.7	mitochondrial electron transport / ATP synthesis.cytochrome c oxidase	146988	no description |163	-0.390078
9.7	mitochondrial electron transport / ATP synthesis.cytochrome c oxidase	184789	{COX2a} Cytochrome c oxidase subunit II, protein IIa of split subunit. |789.621428571429	-3.55773
9.7	mitochondrial electron transport / ATP synthesis.cytochrome c oxidase	95928	{COX18} putative cytochrome c oxidase assembly factor, mitochondrial |73.6	-1.42582
9.8	mitochondrial electron transport / ATP synthesis.uncoupling protein	138059	{UCP1} uncoupling protein, probably mitochondrial |589.904192774033	-2.60695
9.9	mitochondrial electron transport / ATP synthesis.F1-ATPase	136578	{ATP6} F1Fo ATP synthase subunit 6, mitochondrial |331.811607142857	-1.41431
9.9	mitochondrial electron transport / ATP synthesis.F1-ATPase	141145	{ATP1B} F1Fo ATP synthase, alpha subunit, mitochondrial |460.565905626961	-2.63273
9.9	mitochondrial electron transport / ATP synthesis.F1-ATPase	133544	{ATP15} F1Fo ATP synthase, epsilon subunit, mitochondrial |160.749145040502	-0.228095
9.9	mitochondrial electron transport / ATP synthesis.F1-ATPase	78348	{ATP2} Beta subunit of mitochondrial ATP synthase. |3604.83566588057	-1.91237
9.9	mitochondrial electron transport / ATP synthesis.F1-ATPase	185200	{ATP4} Mitochondrial F1Fo ATP synthase, delta subunit |199.425	-2.05385
9.9	mitochondrial electron transport / ATP synthesis.F1-ATPase	76602	{ATP1} F1Fo ATP synthase, alpha subunit, mitochondrial |	-4.20488
9.9	mitochondrial electron transport / ATP synthesis.F1-ATPase	191596	{ATP5} Mitochondrial ATP synthase subunit 5, OSCP subunit |192.95	-3.57567
9.9	mitochondrial electron transport / ATP synthesis.F1-ATPase	194183	{ATP3} F1F0 ATP synthase, gamma subunit, mitochondrial |435	-5.19674
4.2	glycolysis.PGM	18029	{GPM1b} Phosphoglucomutase, possible cytosolic form |2914.18214285714	-2.56253
4.3	glycolysis.G6PIsomerase	135220	{PGI} phosphoglucose isomerase |2373.34166666667	-1.54114
4.4	glycolysis.PPFK	196624	{PFK1P} Phosphofructokinase family protein, plastid form |897.588095238095	-0.426072
4.4	glycolysis.PPFK	196430	{PFK2} Phosphofructokinase family protein |899.621428571429	-1.51521
4.7	glycolysis.aldolase	152892	{FBA1} fructose-1,6-bisphosphate aldolase |1363.05238095238	-3.60241
4.7	glycolysis.aldolase	29185	{FBA2} fructose-1,6-bisphosphate aldolase |1469.50476190476	-1.48714
4.9	glycolysis.glyceraldehyde 3-phosphate dehydrogenase	140618	{GAP1a} glyceraldehyde 3-phosphate dehydrogenase, plastid precursor |2532.47562902784	-1.48915
4.11	glycolysis.phosphoglycerate mutase	161085	{PGM1b} Phosphoglycerate mutase, possible cytosolic form |2391.89940360599	-0.933123
4.12	glycolysis.enolase	83064	{PGH,PGH1} Enolase (2-Phosphoglycerate Dehydratase) |2766.16163221731	-0.346717
4.13	glycolysis.PK	118203	{PYK9} pyruvate kinase |1325.09238816739	-0.313899
4.13	glycolysis.PK	122254	{PYK5} pyruvate kinase |1304.69523809524	-3.80564
4.13	glycolysis.PK	136854	{PYK1} Pyruvate Kinase, probably cytosolic |2290.68033078033	-1.52488
4.13	glycolysis.PK	196263	{PYK2} Pyruvate kinase, cytosolic |1256.40802669553	-1.42582
4.14	glycolysis.PEPCase	80312	{PEPC1} Phosphoenolpyruvate carboxylase, isoform 1 |2847.05048406784	-0.907787
4.14	glycolysis.PEPCase	182821	{PEPC2} Phosphoenolpyruvate carboxylase, isoform 2 |2525.68429677774	-1.27405
7.1.1	OPP.oxidative PP.G6PD	119861	{GLD1} putative glucose-6-phosphate-1-dehydrogenase, cytosolic |1161.3832155246	3.24267
7.1.3	OPP.oxidative PP.6-phosphogluconate dehydrogenase	158911	{GND1b} 6-phosphogluconate dehydrogenase, decarboxylating, possible cytosolic form |1186.33333333333	0.656354
7.2.3	OPP.non-reductive PP.ribulose-phosphate 3-epimerase	6964	{RPE2} D-Ribulose-5-Phosphate 3-Epimerase |367	-1.76938
7.2.4	OPP.non-reductive PP.ribose 5-phosphate isomerase	55838	{RPI} Ribose-5-phosphate isomerase, plastid precursor |541.643532655808	-3.60241
11.3	lipid metabolism.Phospholipid synthesis	194257	{PGP1b} |279.565582964251	0.0967158
11.3	lipid metabolism.Phospholipid synthesis	40158	{SDC1} |595|595	-0.0591471
11.3	lipid metabolism.Phospholipid synthesis	142643	{KDG1} diacylglycerol kinase |295.232875428551	2.49346
11.3.2	lipid metabolism.Phospholipid synthesis.choline kinase	118793	{ETK1} |284.3	0.23692
11.3.3	lipid metabolism.Phospholipid synthesis.phosphatidate cytidylyltransferase	173650	no description |242	-1.1061
11.3.4	lipid metabolism.Phospholipid synthesis.CDP-diacylglycerol-inositol 3-phosphatidyltransferase	186369	{PIS1} |228	-2.02454
11.3.7	lipid metabolism.Phospholipid synthesis.cyclopropane-fatty-acyl-phospholipid synthase	191650	{CFA1} |712.766666666667	0.310493
11.10.2	lipid metabolism.glycolipid synthesis.DGDG synthase	196553	{DGD1} galactolipid galactosyltransferase |1624	-0.47289
11.10.3	lipid metabolism.glycolipid synthesis.UDP-sulfoquinovose synthase	27658	{SQD1} UDP-sulfoquinovose synthase |1256.5	-5.01076
11.10.4	lipid metabolism.glycolipid synthesis.sulfolipid synthase	121326	{SQD2b} |	-1.39867
11.8.1	lipid metabolism.'exotics' (steroids, squalene etc).sphingolipids	147241	{KDG2} diacylglycerol kinase |148.4	-2.56595
11.8.1	lipid metabolism.'exotics' (steroids, squalene etc).sphingolipids	119291	{SPT2} |314	1.05714
11.8.1.3	lipid metabolism.'exotics' (steroids, squalene etc).sphingolipids.ceramide glucosyltransferase	34629	{GTR24} glycosyl transferase |94	-1.96548
11.8.4	lipid metabolism.'exotics' (steroids, squalene etc).3-beta hydroxysteroid dehydrogenase/isomerase	58501	{HSD1} putative steroid dehydrogenase |379	-1.44437
11.8.6	lipid metabolism.'exotics' (steroids, squalene etc).cycloartenol synthase	196409	{CAS} cycloartenol synthase |1159.22594905095|1163	-1.22359
11.8.10	lipid metabolism.'exotics' (steroids, squalene etc).phosphatidylcholine—sterol O-acyltransferase	186846	{LACT} Lecithin:cholesterol acyltransferase |189.766666666667	-2.18134
11.2.1	lipid metabolism.FA desaturation.desaturase	117883	{FAD5} |863.574069830993	-2.78631
11.2.3	lipid metabolism.FA desaturation.omega 3 desaturase	56237	{FAD7} |1892.55337301587	-0.639289
11.2.4	lipid metabolism.FA desaturation.omega 6 desaturase	56668	{DES6} |1169.16730392157	-2.15765
11.2.4	lipid metabolism.FA desaturation.omega 6 desaturase	135825	Fatty acid desaturase |979.975	0.297632
11.1.1	lipid metabolism.FA synthesis and FA elongation.Acetyl CoA Carboxylation	122970	{ACC} biotin carboxylase |611.184611825157	-1.511
11.1.1	lipid metabolism.FA synthesis and FA elongation.Acetyl CoA Carboxylation	183660	no description |99.6666666666667	-2.85384
11.1.2	lipid metabolism.FA synthesis and FA elongation.Acetyl CoA Transacylase	101671	no description |261	-2.53845
11.1.3	lipid metabolism.FA synthesis and FA elongation.ketoacyl ACP synthase	139619	{KAS2} |1006.5	-4.754
11.1.7	lipid metabolism.FA synthesis and FA elongation.ACP thioesterase	196283	acyl carrier protein thioesterase, putative |442.141522855281	2.55164
11.1.8	lipid metabolism.FA synthesis and FA elongation.acyl coa ligase	194063	{ACS1} Acetyl CoA synthetase |1043.65722025815	-1.32573
11.1.8	lipid metabolism.FA synthesis and FA elongation.acyl coa ligase	188925	no description |422.556359394601	-0.000637333
11.1.12	lipid metabolism.FA synthesis and FA elongation.ACP protein	132151	{ACP1} acyl-carrier protein, probably mitochondrial |234.701841540633	-2.21447
11.1.13	lipid metabolism.FA synthesis and FA elongation.acyl-CoA binding protein	133008	{ACBP} |236.87130952381	-2.85384
11.1.13	lipid metabolism.FA synthesis and FA elongation.acyl-CoA binding protein	141204	no description |457.77	-2.76711
11.1.31	lipid metabolism.FA synthesis and FA elongation.pyruvate DH	155587	{PDC2} plastid pyruvate dehydrogenase, E1 component, alpha subunit |414	-4.44655
11.1.31	lipid metabolism.FA synthesis and FA elongation.pyruvate DH	196500	{DLA2} dihydrolipoamide acetyltransferase, possibly plastidic |384	-4.32817
11.1.31	lipid metabolism.FA synthesis and FA elongation.pyruvate DH	190446	{PDH2} pyruvate dehydrogenase, E1 beta subunit, plastid precursor |802	-1.51521
11.9.2	lipid metabolism.lipid degradation.lipases	108522	{LIPG1} putative carboxylic ester hydrolase/ lipase |294	-0.579555
11.9.2	lipid metabolism.lipid degradation.lipases	142444	no description |130.139020998429	-0.858868
11.9.2.1	lipid metabolism.lipid degradation.lipases.triacylglycerol lipase	184308	{FAP12} Flagellar Associated Protein |159.433333333333	-2.39828
11.9.2.1	lipid metabolism.lipid degradation.lipases.triacylglycerol lipase	142824	no description |53.5	-2.10752
11.9.2.1	lipid metabolism.lipid degradation.lipases.triacylglycerol lipase	122836	{LIPG2} triacylglycerol lipase (gastric ligase) precursor |291.6	1.37078
6.3	gluconeogenesis.Malate DH	137163	{MDH1} malate dehydrogenase |517.662878787879|573.715873015873	-1.61941
6.3	gluconeogenesis.Malate DH	126023	{MDH2} malate dehydrogenase |1197.83333333333	-1.92262
6.5	gluconeogenese/ glyoxylate cycle.pyruvate dikinase	196616	{PPD2} Pyruvate,phosphate dikinase (PPDK) |3477.62963667326	-2.11132
8.1.1.1	TCA / org. transformation.TCA.pyruvate DH.E1	139515	{PDH1a} pyruvate dehydrogenase, E1 beta subunit, mitochondrial precursor |845	0.0967158
8.1.1.2	TCA / org. transformation.TCA.pyruvate DH.E2	149709	{DLA1} dihydrolipoamide acetyltransferase, probably mitochondrial |1578.67519698441	0.534519
8.1.1.3	TCA / org. transformation.TCA.pyruvate DH.E3	57890	{DLDH1} dihydrolipoyl dehydrogenase, mitochondrial precursor |1558.16581333309	0.996202
8.1.2	TCA / org. transformation.TCA.CS	194915	{CIS1} citrate synthase, putative mitochondrial isoform |1723.41666666667	0.00797329
8.1.3	TCA / org. transformation.TCA.aconitase	132888	no description |1263.13712726114	0.0658823
8.1.3	TCA / org. transformation.TCA.aconitase	129025	{ACH1} Aconitate hydratase, mitochondrial |1511.84883094342	1.73264
8.1.4	TCA / org. transformation.TCA.IDH	196567	{IDH3} isocitrate dehydrogenase, NADP-dependent, mitochondrial |1865.41428571429	-2.41226
8.1.5	TCA / org. transformation.TCA.2-oxoglutarate dehydrogenase	79471	{OGD1} 2-oxoglutarate dehydrogenase, E1 subunit |1925.5	-2.2315
8.1.6	TCA / org. transformation.TCA.succinyl-CoA ligase	24101	{SCLB1a} Succinate-CoA ligase beta chain, mitochondrial precursor |835.75	-3.20591
8.1.6	TCA / org. transformation.TCA.succinyl-CoA ligase	196570	{SCLA1} Succinyl-CoA ligase alpha-chain, mitochondrial precursor |936	-2.26295
8.1.7	TCA / org. transformation.TCA.succinate dehydrogenase	145357	no description |126	-1.26478
8.1.9	TCA / org. transformation.TCA.malate DH	137163	{MDH1} malate dehydrogenase |517.662878787879|573.715873015873	-1.61941
8.1.9	TCA / org. transformation.TCA.malate DH	60444	{MDHM} Malate dehydrogenase |1652.63333333333	-1.83055
8.2.4	TCA / org. transformation.other organic acid transformaitons.IDH	196044	{IDH2} isocitrate dehydrogenase, NAD-dependent |1154.93242800876	-1.66997
8.2.9	TCA / org. transformation.other organic acid transformaitons.cyt MDH	192083	{MDHP} NADP-Malate Dehydrogenase |1173.82619047619	-1.32537
8.2.9	TCA / org. transformation.other organic acid transformaitons.cyt MDH	158129	{MDHC} Malate Dehydrogenase (NAD-dependent), cytosolic |1469.3380952381	0.0898821
8.2.10	TCA / org. transformation.other organic acid transformaitons.malic	126820	{MME6} NADP-dependent malic enzyme |2195.86627560735	-3.37309
8.2.10	TCA / org. transformation.other organic acid transformaitons.malic	196833	{MME1} NAD malic enzyme, mitochondrial precurser |2455.04898016936	-2.1131
8.2.10	TCA / org. transformation.other organic acid transformaitons.malic	196351	{MME5} NADP malic enzyme |1250.30244477188	0.0967158
8.2.10	TCA / org. transformation.other organic acid transformaitons.malic	147722	{MME2} NADP malic enzyme |2214.1445359139	-1.20261
8.2.11	TCA / org. transformation.other organic acid transformaitons.atp-citrate lyase	186611	{ACLB1} ATP Citrate Lyase, subunit B |1134.5	-3.60568
16.1.1	secondary metabolism.isoprenoids.non-mevalonate pathway	136810	{GGR} geranylgeranyl reductase, putative chloroplast precursor |600	-3.7474
16.1.1.1	secondary metabolism.isoprenoids.non-mevalonate pathway.DXS	196568	{DXS,DXS1} 1-deoxy-D-xylulose 5-phosphate synthase, putative chloroplast precursor |1561.5	-4.09379
16.1.1.3	secondary metabolism.isoprenoids.non-mevalonate pathway.CMS	196604	{CMS} 4-diphosphocytidyl-2C-methyl-D-erythritol synthase, putative chloroplast precursor |538.233735911792	-1.78086
16.1.1.4	secondary metabolism.isoprenoids.non-mevalonate pathway.CMK	137673	{CMK} 4-diphosphocytidyl-2-C-methyl-D-erythritol kinase, putative chloroplast precursor |425.290516707649	-1.12402
16.1.1.5	secondary metabolism.isoprenoids.non-mevalonate pathway.MCS	188593	{MCS} 2-C-methyl-D-erythritol 2,4-cyclodiphosphate synthase, putative chloroplast precursor |652.5	-3.05923
16.1.1.6	secondary metabolism.isoprenoids.non-mevalonate pathway.HDS	55268	{HDS} 1-hydroxy-2-methyl-2-(E)-butenyl 4-diphosphate synthase, putative chloroplast precursor |1111.14582492053	-4.49057
16.1.1.7	secondary metabolism.isoprenoids.non-mevalonate pathway.HDR	59822	{IDS} 4-hydroxy-3-methylbut-2-enyl diphosphate reductase, putative chloroplast precursor |444	-0.778319
16.1.1.10	secondary metabolism.isoprenoids.non-mevalonate pathway.geranylgeranyl pyrophosphate synthase	195038	{GGPS} geranylgeranyl diphosphate synthase, putative chloroplast precursor |1485.05680985681	-1.13251
16.1.2.2	secondary metabolism.isoprenoids.mevalonate pathway.HMG-CoA synthase	118594	no description |151	0.0978261
16.1.2.7	secondary metabolism.isoprenoids.mevalonate pathway.isopentenyl pyrophosphate:dimethyllallyl pyrophosphate isomerase	24471	{IDI} isopentenyl-diphosphate delta-isomerase, putative chloroplast precursor |603.850732591482	-2.2401
16.1.2.8	secondary metabolism.isoprenoids.mevalonate pathway.geranyl diphosphate synthase	135421	{GPPS} geranyl diphosphate synthase, putative chloroplast precursor |335.333333333333	-0.907787
16.1.2.9	secondary metabolism.isoprenoids.mevalonate pathway.farnesyl pyrophosphate synthetase	137019	{FPPS} farnesyl diphosphate synthase, putative |1035.33333333333	-0.6369
16.1.3.3	secondary metabolism.isoprenoids.tocopherol biosynthesis.MPBQ/MSBQ methyltransferase	129760	{VTE3} |	-0.712048
16.1.3.4	secondary metabolism.isoprenoids.tocopherol biosynthesis.tocopherol cyclase	101649	no description |523	-2.56595
16.1.3.5	secondary metabolism.isoprenoids.tocopherol biosynthesis.tocopherol methyltransferase	129990	{VTE4} |332	-1.38432
16.1.4	secondary metabolism.isoprenoids.carotenoids	182457	{ZDS} zeta-carotene desaturase, putative chloroplast precursor |1472.5	-1.89525
16.1.4	secondary metabolism.isoprenoids.carotenoids	164400	{CHYB} beta-carotene hydroxylase, putative chloroplast precursor; PMID:15849308 |364	-0.629509
16.1.4	secondary metabolism.isoprenoids.carotenoids	130438	no description |802.571531673893	0.0151496
16.1.4	secondary metabolism.isoprenoids.carotenoids	196597	{CRTISO} carotenoid isomerase, putative chloroplast precursor |1325.99941377745	-0.579555
16.1.4.1	secondary metabolism.isoprenoids.carotenoids.phytoene synthase	59715	{PSY,PSY1} phytoene synthase, putative chloroplast precursor |1132.75	-3.22012
16.1.4.2	secondary metabolism.isoprenoids.carotenoids.phytoene dehydrogenase	78128	{PDS} phytoene desaturase, putative chloroplast precursor |2031.525	-0.883979
16.1.4.4	secondary metabolism.isoprenoids.carotenoids.lycopene epsilon cyclase	187094	{LCYE} lycopene epsilon cyclase, putative chloroplast precursor |341|332.75	-1.0262
16.1.4.5	secondary metabolism.isoprenoids.carotenoids.lycopene beta cyclase	187094	{LCYE} lycopene epsilon cyclase, putative chloroplast precursor |341|332.75	-0.907787
16.1.4.21	secondary metabolism.isoprenoids.carotenoids.violaxanthin de-epoxidase	195571	{VDR1} violaxanthin de-epoxidase related, chloroplast |	-1.99548
16.1.5	secondary metabolism.isoprenoids.terpenoids	196409	{CAS} cycloartenol synthase |1159.22594905095|1163	-1.48538
16.1.5	secondary metabolism.isoprenoids.terpenoids	182663	{SPPS} solanesyl diphosphate synthase, putative chloroplast precursor |392	-0.91258
13.1.2.3	amino acid metabolism.synthesis.glutamate family.arginine	58140	{AGS1} arginosuccinate synthase |946.217507450303	-0.0798519
13.1.2.3	amino acid metabolism.synthesis.glutamate family.arginine	101662	{ARG7} Argininosuccinate lyase |658.5	-1.15661
13.1.2.3	amino acid metabolism.synthesis.glutamate family.arginine	188762	{OTC1} |844.821802437796	-1.10925
13.1.2.3.2	amino acid metabolism.synthesis.glutamate family.arginine.acetylglutamate kinase	78991	Acetylglutamate kinase-like protein, chloroplast precursor |327|327	-0.611988
13.1.2.3.4	amino acid metabolism.synthesis.glutamate family.arginine.acetylornithine aminotransferase	139007	{ARG9} acetylornithine aminotransferase |464	-0.96441
13.1.2.3.11	amino acid metabolism.synthesis.glutamate family.arginine.carbamoyl-phosphate synthase	128227	no description |525|525	-1.81895
13.1.3.4	amino acid metabolism.synthesis.aspartate family.methionine	196483	{METC} cystathionine beta-lyase |957.510755571935	3.24267
13.1.3.4	amino acid metabolism.synthesis.aspartate family.methionine	76715	{METH} Vitamin B12 (cobalamin) dependent methionine synthase |926.71036167634	-0.391222
13.1.3.4	amino acid metabolism.synthesis.aspartate family.methionine	154307	{METE} Vitamin B12 (cobalamin) independent methionine synthase |2619.42805141356	-0.611988
13.1.3.4	amino acid metabolism.synthesis.aspartate family.methionine	182408	{METM} S-Adenosylmethionine synthetase |3409.16690050146	-3.83067
13.1.3.4.2	amino acid metabolism.synthesis.aspartate family.methionine.cystathionine beta-lyase	24268	{CGS1} cystathionine gamma-synthase |562.666666666667	-2.91179
13.1.3.5	amino acid metabolism.synthesis.aspartate family.lysine	126518	{DPS1} dihydrodipicolinate synthase |1300.5191253236	0.0265999
13.1.3.5.3	amino acid metabolism.synthesis.aspartate family.lysine.LL-diaminopimelic acid aminotransferase	129557	{ATR1} aminotransferase, putative |538	-1.1061
13.1.3.5.4	amino acid metabolism.synthesis.aspartate family.lysine.diaminopimelate epimerase	150957	{DPE1} diaminopimelate (DAP) epimerase, putative |398	-1.12756
13.1.3.5.5	amino acid metabolism.synthesis.aspartate family.lysine.diaminopimelate decarboxylase	146886	{DPD1} diaminopimelate (DAP) decarboxylase, putative |794	-1.48086
13.1.4.1	amino acid metabolism.synthesis.branched chain group.common	140839	{AAI1} acetohydroxy acid isomeroreductase |1613	-0.228413
13.1.4.1	amino acid metabolism.synthesis.branched chain group.common	187392	{BCA2} branched-chain amino acid aminotransferase, putative |634.447619047619	1.03184
13.1.4.1	amino acid metabolism.synthesis.branched chain group.common	5137	{ALSS1} acetolactate synthase, small subunit |453	-0.611988
13.1.4.1	amino acid metabolism.synthesis.branched chain group.common	138180	{ALSL1} acetolactate synthase, large subunit |2760.09345238095	-0.936594
13.1.6.1.1	amino acid metabolism.synthesis.aromatic aa.chorismate.3-deoxy-D-arabino-heptulosonate 7-phosphate synthase	192517	{SHKA1} 3-deoxy-D-arabino-heptulosonate 7-phosphate synthetase |2699.13222499083	-4.17638
13.1.6.1.2	amino acid metabolism.synthesis.aromatic aa.chorismate.3-dehydroquinate synthase	196549	{DHQS} 3-dehydroquinate synthase |918.892873791716	-2.41943
13.1.6.1.5	amino acid metabolism.synthesis.aromatic aa.chorismate.shikimate kinase	196593	{SHKF1} possible shikimate kinase |342.016618382973	-0.611988
13.1.6.1.6	amino acid metabolism.synthesis.aromatic aa.chorismate.5-enolpyruvylshikimate-3-phosphate synthase	133088	{SHKG1} 5-enolpyruvylshikimate-3-phosphate (EPSP) synthase |2167.74929949489	-0.196905
13.1.6.1.7	amino acid metabolism.synthesis.aromatic aa.chorismate.chorismate synthase	191993	{SHKH1} chorismate synthase, putative |1230.55033348532	-2.74147
23.4.1	nucleotide metabolism.phosphotransfer and pyrophosphatases.adenylate kinase	196741	{FAP42} Flagellar Associated Protein Similar to Adenylate/Guanylate Kinases |387.062494172494	-1.29009
23.4.1	nucleotide metabolism.phosphotransfer and pyrophosphatases.adenylate kinase	194134	{AK3} Adenylate Kinase Homolog 3 |667.039381988381	-0.0872574
23.4.1	nucleotide metabolism.phosphotransfer and pyrophosphatases.adenylate kinase	118113	{AK6} Adenylate Kinase Homolog 6 |717.133115079365	-0.639289
23.4.1	nucleotide metabolism.phosphotransfer and pyrophosphatases.adenylate kinase	194947	{FAK1} Flagellar Adenylate Kinase Homolog1 |50.1	-0.858868
23.4.1	nucleotide metabolism.phosphotransfer and pyrophosphatases.adenylate kinase	133184	{AK4} Adenylate Kinase Homolog 2 |763.323452380952	-2.69064
23.4.2	nucleotide metabolism.phosphotransfer and pyrophosphatases.guanylate kinase	111725	no description |	-0.601492
23.4.3	nucleotide metabolism.phosphotransfer and pyrophosphatases.uridylate kinase	141571	no description |388.5	-0.629509
23.4.3	nucleotide metabolism.phosphotransfer and pyrophosphatases.uridylate kinase	114363	{AK2} Adenylate Kinase Homolog 2 |310.333333333333	-0.858868
23.4.3	nucleotide metabolism.phosphotransfer and pyrophosphatases.uridylate kinase	129362	{FAK1} ODA5-associated flagellar adenylate kinase |326.666666666667	-0.313899
23.4.3	nucleotide metabolism.phosphotransfer and pyrophosphatases.uridylate kinase	103322	{AK5} Adenylate Kinase |271.333333333333	-3.00534
23.4.10	nucleotide metabolism.phosphotransfer and pyrophosphatases.nucleoside diphosphate kinase	180221	{FAP67} Flagellar Associated Protein |418.06984453047	0.0650999
23.4.10	nucleotide metabolism.phosphotransfer and pyrophosphatases.nucleoside diphosphate kinase	139197	{RSP23} Radial spoke protein 23 |476.474664502164	-1.15661
23.4.10	nucleotide metabolism.phosphotransfer and pyrophosphatases.nucleoside diphosphate kinase	58944	{FAP103} Flagellar Associated Protein Similar to Nucleoside Diphosphate Kinase |1218.06927863803	1.05714
23.4.99	nucleotide metabolism.phosphotransfer and pyrophosphatases.misc	78991	Acetylglutamate kinase-like protein, chloroplast precursor |327|327	-0.611988
23.4.99	nucleotide metabolism.phosphotransfer and pyrophosphatases.misc	133620	{IPY1} |1034.1169047619	-2.00748
23.4.99	nucleotide metabolism.phosphotransfer and pyrophosphatases.misc	174103	{IPY3} |1340.61071428571	-0.306441
23.1.2.3	nucleotide metabolism.synthesis.purine.GAR transformylase	117678	no description |612.5	-1.29009
23.1.2.4	nucleotide metabolism.synthesis.purine.FGAR amidotransferase	131059	AIR synthase related protein |1509	-2.90738
23.1.2.5	nucleotide metabolism.synthesis.purine.AIR synthase	54374	no description |1136.55241957828	-0.0323757
23.1.2.6	nucleotide metabolism.synthesis.purine.AIR carboxylase	196726	{PUR6} Phosphoribosylaminoimidazole carboxylase, eukaryotic-type |882.86680227045	-1.8838
23.1.2.9	nucleotide metabolism.synthesis.purine.AICAR transformylase and IMP synthase	116979	no description |445.174086267149	-0.629509
23.1.2.31	nucleotide metabolism.synthesis.purine.GMP synthetase	126329	{GUA1} GMP synthetase |807.806466379353	-4.10824

## Sheet: Table S3
Table S3: Metabolism overview and expression status of differntially expressed genes in PRJNA51835 , Fold change, treated vs untreated
BinCode	BinName	id	description	Fold c hange
3.5	minor CHO metabolism.others	115347	no description |258.242857142857	-0.50368
3.5	minor CHO metabolism.others	158244	{LCI28} low-CO2-induced putative aldose reductase. |647.879761904762	0.326184
3.5	minor CHO metabolism.others	147383	no description |193.661111111111	0.208992
3.5	minor CHO metabolism.others	111372	PfkB-type carbohydrate kinase family protein, ribokinase |246	-0.256808
3.5	minor CHO metabolism.others	169453	no description |125.1	-0.260084
3.5	minor CHO metabolism.others	187168	{AEP} Aldose-1-epimerase |732.114374293281	-0.505908
3.5	minor CHO metabolism.others	97880	no description |373.645238095238	0.127925
3.5	minor CHO metabolism.others	144222	{COG8} Component of oligomeric golgi complex 8 |340	-0.0687529
3.5	minor CHO metabolism.others	190792	{RSP5} Radial spoke protein 5 |94.4	-0.102954
10.1	cell wall.precursor synthesis	152568	no description |91.7	0.252845
9.2.2	mitochondrial electron transport / ATP synthesis.NADH-DH.type II.external	133334	{NDA2} putative type-II calcium-dependant NADH dehydrogenase, mitochondrial |708.916666666667	-0.0213297
9.3	mitochondrial electron transport / ATP synthesis.electron transfer flavoprotein	180281	{ETFB } putative electron transfer flavoprotein beta-subunit , mitochondrial |218	0.200921
9.3	mitochondrial electron transport / ATP synthesis.electron transfer flavoprotein	111715	{FUO1} Putative electron transfer flavoprotein-ubiquinone oxidoreductase. |796.359698224963	0.153059
9.3	mitochondrial electron transport / ATP synthesis.electron transfer flavoprotein	189344	{ETFA } putative electron transfer flavoprotein alpha-subunit , mitochondrial |253	0.0034131
9.4	mitochondrial electron transport / ATP synthesis.alternative oxidase	129968	{AOX1} |790.038690476191	0.651901
9.5	mitochondrial electron transport / ATP synthesis.cytochrome c reductase	77031	{QCR7 } Ubiquinol:cytochrome c oxidoredutase (Complex III) 14 kDa subunit subunit |192.6	-0.255247
9.5	mitochondrial electron transport / ATP synthesis.cytochrome c reductase	129128	{RIP1} Rieske iron-sulfur protein of mitochondrial ubiquinol-cytochrome c reductase. |1137.55847885598	-0.438882
9.6	mitochondrial electron transport / ATP synthesis.cytochrome c	133395	{CYC1} ubiquinol:cytochrome c oxidoreductase cytochrome c1, mitochondrial |910.083333333333	-0.184776
9.6	mitochondrial electron transport / ATP synthesis.cytochrome c	195343	{CCS1} c-type cytochrome synthesis 1 |344	0.0204272
9.7	mitochondrial electron transport / ATP synthesis.cytochrome c oxidase	56014	{COX3} Cytochrome c oxidase subunit III |254	0.0382458
9.7	mitochondrial electron transport / ATP synthesis.cytochrome c oxidase	159985	{SCO1} Putative cytochrome c oxidase assembly factor SCO1, mitochondrial |276	-0.0795439
9.7	mitochondrial electron transport / ATP synthesis.cytochrome c oxidase	190125	{COX2b} Cytochrome c oxidase subunit II, protein IIb of split subunit. |709.712015868338	0.225902
9.7	mitochondrial electron transport / ATP synthesis.cytochrome c oxidase	146988	no description |163	0.443088
9.7	mitochondrial electron transport / ATP synthesis.cytochrome c oxidase	184789	{COX2a} Cytochrome c oxidase subunit II, protein IIa of split subunit. |789.621428571429	0.0458767
9.7	mitochondrial electron transport / ATP synthesis.cytochrome c oxidase	95928	{COX18} putative cytochrome c oxidase assembly factor, mitochondrial |73.6	-0.034187
9.8	mitochondrial electron transport / ATP synthesis.uncoupling protein	138059	{UCP1} uncoupling protein, probably mitochondrial |589.904192774033	0.489744
9.9	mitochondrial electron transport / ATP synthesis.F1-ATPase	136578	{ATP6} F1Fo ATP synthase subunit 6, mitochondrial |331.811607142857	-0.0670153
9.9	mitochondrial electron transport / ATP synthesis.F1-ATPase	141145	{ATP1B} F1Fo ATP synthase, alpha subunit, mitochondrial |460.565905626961	0.411101
9.9	mitochondrial electron transport / ATP synthesis.F1-ATPase	133544	{ATP15} F1Fo ATP synthase, epsilon subunit, mitochondrial |160.749145040502	0.225237
9.9	mitochondrial electron transport / ATP synthesis.F1-ATPase	78348	{ATP2} Beta subunit of mitochondrial ATP synthase. |3604.83566588057	-0.137633
9.9	mitochondrial electron transport / ATP synthesis.F1-ATPase	185200	{ATP4} Mitochondrial F1Fo ATP synthase, delta subunit |199.425	-0.190464
9.9	mitochondrial electron transport / ATP synthesis.F1-ATPase	76602	{ATP1} F1Fo ATP synthase, alpha subunit, mitochondrial |	-0.405977
9.9	mitochondrial electron transport / ATP synthesis.F1-ATPase	191596	{ATP5} Mitochondrial ATP synthase subunit 5, OSCP subunit |192.95	-0.0249199
9.9	mitochondrial electron transport / ATP synthesis.F1-ATPase	194183	{ATP3} F1F0 ATP synthase, gamma subunit, mitochondrial |435	-0.0805079
4.2	glycolysis.PGM	18029	{GPM1b} Phosphoglucomutase, possible cytosolic form |2914.18214285714	-0.316163
4.3	glycolysis.G6PIsomerase	135220	{PGI} phosphoglucose isomerase |2373.34166666667	0.37171
4.4	glycolysis.PPFK	196624	{PFK1P} Phosphofructokinase family protein, plastid form |897.588095238095	0.821304
4.4	glycolysis.PPFK	196430	{PFK2} Phosphofructokinase family protein |899.621428571429	-0.548105
4.7	glycolysis.aldolase	152892	{FBA1} fructose-1,6-bisphosphate aldolase |1363.05238095238	-0.582281
4.7	glycolysis.aldolase	29185	{FBA2} fructose-1,6-bisphosphate aldolase |1469.50476190476	-0.0851018
4.9	glycolysis.glyceraldehyde 3-phosphate dehydrogenase	140618	{GAP1a} glyceraldehyde 3-phosphate dehydrogenase, plastid precursor |2532.47562902784	-0.407784
4.11	glycolysis.phosphoglycerate mutase	161085	{PGM1b} Phosphoglycerate mutase, possible cytosolic form |2391.89940360599	0.195879
4.12	glycolysis.enolase	83064	{PGH,PGH1} Enolase (2-Phosphoglycerate Dehydratase) |2766.16163221731	-0.0394247
4.13	glycolysis.PK	118203	{PYK9} pyruvate kinase |1325.09238816739	-0.169975
4.13	glycolysis.PK	122254	{PYK5} pyruvate kinase |1304.69523809524	-0.112571
4.13	glycolysis.PK	136854	{PYK1} Pyruvate Kinase, probably cytosolic |2290.68033078033	0.0174071
4.13	glycolysis.PK	196263	{PYK2} Pyruvate kinase, cytosolic |1256.40802669553	-0.0921912
4.14	glycolysis.PEPCase	80312	{PEPC1} Phosphoenolpyruvate carboxylase, isoform 1 |2847.05048406784	-0.416052
4.14	glycolysis.PEPCase	182821	{PEPC2} Phosphoenolpyruvate carboxylase, isoform 2 |2525.68429677774	1.09985
11.3	lipid metabolism.Phospholipid synthesis	194257	{PGP1b} |279.565582964251	0.00644857
11.3	lipid metabolism.Phospholipid synthesis	40158	{SDC1} |595|595	-0.0388463
11.3	lipid metabolism.Phospholipid synthesis	142643	{KDG1} diacylglycerol kinase |295.232875428551	0.569165
11.3.2	lipid metabolism.Phospholipid synthesis.choline kinase	118793	{ETK1} |284.3	0.494247
11.3.3	lipid metabolism.Phospholipid synthesis.phosphatidate cytidylyltransferase	173650	no description |242	-0.426827
11.3.4	lipid metabolism.Phospholipid synthesis.CDP-diacylglycerol-inositol 3-phosphatidyltransferase	186369	{PIS1} |228	-0.110201
11.3.7	lipid metabolism.Phospholipid synthesis.cyclopropane-fatty-acyl-phospholipid synthase	191650	{CFA1} |712.766666666667	-0.532527
11.10.2	lipid metabolism.glycolipid synthesis.DGDG synthase	196553	{DGD1} galactolipid galactosyltransferase |1624	0.282804
11.10.3	lipid metabolism.glycolipid synthesis.UDP-sulfoquinovose synthase	27658	{SQD1} UDP-sulfoquinovose synthase |1256.5	-0.2073
11.10.4	lipid metabolism.glycolipid synthesis.sulfolipid synthase	121326	{SQD2b} |	#N/A
11.8.1	lipid metabolism.'exotics' (steroids, squalene etc).sphingolipids	147241	{KDG2} diacylglycerol kinase |148.4	#N/A
11.8.1	lipid metabolism.'exotics' (steroids, squalene etc).sphingolipids	119291	{SPT2} |314	-0.370231
11.8.1.3	lipid metabolism.'exotics' (steroids, squalene etc).sphingolipids.ceramide glucosyltransferase	34629	{GTR24} glycosyl transferase |94	#N/A
11.8.4	lipid metabolism.'exotics' (steroids, squalene etc).3-beta hydroxysteroid dehydrogenase/isomerase	58501	{HSD1} putative steroid dehydrogenase |379	0.281661
11.8.6	lipid metabolism.'exotics' (steroids, squalene etc).cycloartenol synthase	196409	{CAS} cycloartenol synthase |1159.22594905095|1163	#N/A
11.8.10	lipid metabolism.'exotics' (steroids, squalene etc).phosphatidylcholine—sterol O-acyltransferase	186846	{LACT} Lecithin:cholesterol acyltransferase |189.766666666667	#N/A
11.2.1	lipid metabolism.FA desaturation.desaturase	117883	{FAD5} |863.574069830993	-0.521514
11.2.3	lipid metabolism.FA desaturation.omega 3 desaturase	56237	{FAD7} |1892.55337301587	-0.552723
11.2.4	lipid metabolism.FA desaturation.omega 6 desaturase	56668	{DES6} |1169.16730392157	-0.912701
11.2.4	lipid metabolism.FA desaturation.omega 6 desaturase	135825	Fatty acid desaturase |979.975	-0.245238
11.1.1	lipid metabolism.FA synthesis and FA elongation.Acetyl CoA Carboxylation	122970	{ACC} biotin carboxylase |611.184611825157	0.164096
11.1.1	lipid metabolism.FA synthesis and FA elongation.Acetyl CoA Carboxylation	183660	no description |99.6666666666667	-0.237911
11.1.2	lipid metabolism.FA synthesis and FA elongation.Acetyl CoA Transacylase	101671	no description |261	-0.554376
11.1.3	lipid metabolism.FA synthesis and FA elongation.ketoacyl ACP synthase	139619	{KAS2} |1006.5	-0.18556
11.1.7	lipid metabolism.FA synthesis and FA elongation.ACP thioesterase	196283	acyl carrier protein thioesterase, putative |442.141522855281	-0.181995
11.1.8	lipid metabolism.FA synthesis and FA elongation.acyl coa ligase	194063	{ACS1} Acetyl CoA synthetase |1043.65722025815	0.194491
11.1.8	lipid metabolism.FA synthesis and FA elongation.acyl coa ligase	188925	no description |422.556359394601	0.519995
11.1.12	lipid metabolism.FA synthesis and FA elongation.ACP protein	132151	{ACP1} acyl-carrier protein, probably mitochondrial |234.701841540633	0.104729
11.1.13	lipid metabolism.FA synthesis and FA elongation.acyl-CoA binding protein	133008	{ACBP} |236.87130952381	0.463256
11.1.13	lipid metabolism.FA synthesis and FA elongation.acyl-CoA binding protein	141204	no description |457.77	-0.0766208
11.1.31	lipid metabolism.FA synthesis and FA elongation.pyruvate DH	155587	{PDC2} plastid pyruvate dehydrogenase, E1 component, alpha subunit |414	-0.382875
11.1.31	lipid metabolism.FA synthesis and FA elongation.pyruvate DH	196500	{DLA2} dihydrolipoamide acetyltransferase, possibly plastidic |384	-0.244677
11.1.31	lipid metabolism.FA synthesis and FA elongation.pyruvate DH	190446	{PDH2} pyruvate dehydrogenase, E1 beta subunit, plastid precursor |802	-0.679235
11.9.2	lipid metabolism.lipid degradation.lipases	108522	{LIPG1} putative carboxylic ester hydrolase/ lipase |294	#N/A
11.9.2	lipid metabolism.lipid degradation.lipases	142444	no description |130.139020998429	#N/A
11.9.2.1	lipid metabolism.lipid degradation.lipases.triacylglycerol lipase	184308	{FAP12} Flagellar Associated Protein |159.433333333333	#N/A
11.9.2.1	lipid metabolism.lipid degradation.lipases.triacylglycerol lipase	142824	no description |53.5	#N/A
11.9.2.1	lipid metabolism.lipid degradation.lipases.triacylglycerol lipase	122836	{LIPG2} triacylglycerol lipase (gastric ligase) precursor |291.6	1.19071
11.9.3.3	lipid metabolism.lipid degradation.lysophospholipases.glycerophosphodiester phosphodiesterase	123120	{GDPD4} glycerophosphoryl diester phosphodiesterase family protein |408.174603174603	-0.790486
11.9.3.3	lipid metabolism.lipid degradation.lysophospholipases.glycerophosphodiester phosphodiesterase	141624	no description |90.5	0.189677
6.3	gluconeogenesis.Malate DH	137163	{MDH1} malate dehydrogenase |517.662878787879|573.715873015873	-0.0617827
6.3	gluconeogenesis.Malate DH	126023	{MDH2} malate dehydrogenase |1197.83333333333	#N/A
6.5	gluconeogenese/ glyoxylate cycle.pyruvate dikinase	196616	{PPD2} Pyruvate,phosphate dikinase (PPDK) |3477.62963667326	0.855917
4.2	glycolysis.PGM	18029	{GPM1b} Phosphoglucomutase, possible cytosolic form |2914.18214285714	-0.316163
4.3	glycolysis.G6PIsomerase	135220	{PGI} phosphoglucose isomerase |2373.34166666667	0.37171
4.4	glycolysis.PPFK	196624	{PFK1P} Phosphofructokinase family protein, plastid form |897.588095238095	0.821304
4.4	glycolysis.PPFK	196430	{PFK2} Phosphofructokinase family protein |899.621428571429	#N/A
4.7	glycolysis.aldolase	152892	{FBA1} fructose-1,6-bisphosphate aldolase |1363.05238095238	-0.582281
4.7	glycolysis.aldolase	29185	{FBA2} fructose-1,6-bisphosphate aldolase |1469.50476190476	-0.0851018
4.9	glycolysis.glyceraldehyde 3-phosphate dehydrogenase	140618	{GAP1a} glyceraldehyde 3-phosphate dehydrogenase, plastid precursor |2532.47562902784	#N/A
4.11	glycolysis.phosphoglycerate mutase	161085	{PGM1b} Phosphoglycerate mutase, possible cytosolic form |2391.89940360599	0.195879
4.12	glycolysis.enolase	83064	{PGH,PGH1} Enolase (2-Phosphoglycerate Dehydratase) |2766.16163221731	-0.0394247
4.13	glycolysis.PK	118203	{PYK9} pyruvate kinase |1325.09238816739	-0.169975
4.13	glycolysis.PK	122254	{PYK5} pyruvate kinase |1304.69523809524	#N/A
4.13	glycolysis.PK	136854	{PYK1} Pyruvate Kinase, probably cytosolic |2290.68033078033	0.0174071
4.13	glycolysis.PK	196263	{PYK2} Pyruvate kinase, cytosolic |1256.40802669553	#N/A
4.14	glycolysis.PEPCase	80312	{PEPC1} Phosphoenolpyruvate carboxylase, isoform 1 |2847.05048406784	#N/A
4.14	glycolysis.PEPCase	182821	{PEPC2} Phosphoenolpyruvate carboxylase, isoform 2 |2525.68429677774	1.09985
8.1.1.1	TCA / org. transformation.TCA.pyruvate DH.E1	139515	{PDH1a} pyruvate dehydrogenase, E1 beta subunit, mitochondrial precursor |845	#N/A
8.1.1.2	TCA / org. transformation.TCA.pyruvate DH.E2	149709	{DLA1} dihydrolipoamide acetyltransferase, probably mitochondrial |1578.67519698441	#N/A
8.1.1.3	TCA / org. transformation.TCA.pyruvate DH.E3	57890	{DLDH1} dihydrolipoyl dehydrogenase, mitochondrial precursor |1558.16581333309	0.103695
8.1.2	TCA / org. transformation.TCA.CS	194915	{CIS1} citrate synthase, putative mitochondrial isoform |1723.41666666667	0.866888
8.1.3	TCA / org. transformation.TCA.aconitase	132888	no description |1263.13712726114	-0.20156
8.1.3	TCA / org. transformation.TCA.aconitase	129025	{ACH1} Aconitate hydratase, mitochondrial |1511.84883094342	0.134634
8.1.4	TCA / org. transformation.TCA.IDH	196567	{IDH3} isocitrate dehydrogenase, NADP-dependent, mitochondrial |1865.41428571429	-0.0891687
8.1.5	TCA / org. transformation.TCA.2-oxoglutarate dehydrogenase	79471	{OGD1} 2-oxoglutarate dehydrogenase, E1 subunit |1925.5	0.203573
8.1.6	TCA / org. transformation.TCA.succinyl-CoA ligase	24101	{SCLB1a} Succinate-CoA ligase beta chain, mitochondrial precursor |835.75	0.420632
8.1.6	TCA / org. transformation.TCA.succinyl-CoA ligase	196570	{SCLA1} Succinyl-CoA ligase alpha-chain, mitochondrial precursor |936	0.124311
8.1.7	TCA / org. transformation.TCA.succinate dehydrogenase	145357	no description |126	0.330646
8.1.9	TCA / org. transformation.TCA.malate DH	137163	{MDH1} malate dehydrogenase |517.662878787879|573.715873015873	-0.0617827
8.1.9	TCA / org. transformation.TCA.malate DH	60444	{MDHM} Malate dehydrogenase |1652.63333333333	0.312451
8.2.4	TCA / org. transformation.other organic acid transformaitons.IDH	196044	{IDH2} isocitrate dehydrogenase, NAD-dependent |1154.93242800876	-0.0972164
8.2.9	TCA / org. transformation.other organic acid transformaitons.cyt MDH	192083	{MDHP} NADP-Malate Dehydrogenase |1173.82619047619	-0.153767
8.2.9	TCA / org. transformation.other organic acid transformaitons.cyt MDH	158129	{MDHC} Malate Dehydrogenase (NAD-dependent), cytosolic |1469.3380952381	0.558389
8.2.10	TCA / org. transformation.other organic acid transformaitons.malic	126820	{MME6} NADP-dependent malic enzyme |2195.86627560735	-0.442592
8.2.10	TCA / org. transformation.other organic acid transformaitons.malic	196833	{MME1} NAD malic enzyme, mitochondrial precurser |2455.04898016936	0.0571665
8.2.10	TCA / org. transformation.other organic acid transformaitons.malic	196351	{MME5} NADP malic enzyme |1250.30244477188	0.0265135
8.2.10	TCA / org. transformation.other organic acid transformaitons.malic	147722	{MME2} NADP malic enzyme |2214.1445359139	0.546737
8.2.11	TCA / org. transformation.other organic acid transformaitons.atp-citrate lyase	186611	{ACLB1} ATP Citrate Lyase, subunit B |1134.5	0.419995
16.1.1	secondary metabolism.isoprenoids.non-mevalonate pathway	136810	{GGR} geranylgeranyl reductase, putative chloroplast precursor |600	-0.348854
16.1.1.1	secondary metabolism.isoprenoids.non-mevalonate pathway.DXS	196568	{DXS,DXS1} 1-deoxy-D-xylulose 5-phosphate synthase, putative chloroplast precursor |1561.5	-0.450424
16.1.1.3	secondary metabolism.isoprenoids.non-mevalonate pathway.CMS	196604	{CMS} 4-diphosphocytidyl-2C-methyl-D-erythritol synthase, putative chloroplast precursor |538.233735911792	-0.222857
16.1.1.4	secondary metabolism.isoprenoids.non-mevalonate pathway.CMK	137673	{CMK} 4-diphosphocytidyl-2-C-methyl-D-erythritol kinase, putative chloroplast precursor |425.290516707649	#N/A
16.1.1.5	secondary metabolism.isoprenoids.non-mevalonate pathway.MCS	188593	{MCS} 2-C-methyl-D-erythritol 2,4-cyclodiphosphate synthase, putative chloroplast precursor |652.5	0.0719291
16.1.1.6	secondary metabolism.isoprenoids.non-mevalonate pathway.HDS	55268	{HDS} 1-hydroxy-2-methyl-2-(E)-butenyl 4-diphosphate synthase, putative chloroplast precursor |1111.14582492053	-0.18898
16.1.1.7	secondary metabolism.isoprenoids.non-mevalonate pathway.HDR	59822	{IDS} 4-hydroxy-3-methylbut-2-enyl diphosphate reductase, putative chloroplast precursor |444	#N/A
16.1.1.10	secondary metabolism.isoprenoids.non-mevalonate pathway.geranylgeranyl pyrophosphate synthase	195038	{GGPS} geranylgeranyl diphosphate synthase, putative chloroplast precursor |1485.05680985681	-0.154745
16.1.2.2	secondary metabolism.isoprenoids.mevalonate pathway.HMG-CoA synthase	118594	no description |151	#N/A
16.1.2.7	secondary metabolism.isoprenoids.mevalonate pathway.isopentenyl pyrophosphate:dimethyllallyl pyrophosphate isomerase	24471	{IDI} isopentenyl-diphosphate delta-isomerase, putative chloroplast precursor |603.850732591482	#N/A
16.1.2.8	secondary metabolism.isoprenoids.mevalonate pathway.geranyl diphosphate synthase	135421	{GPPS} geranyl diphosphate synthase, putative chloroplast precursor |335.333333333333	-0.156853
16.1.2.9	secondary metabolism.isoprenoids.mevalonate pathway.farnesyl pyrophosphate synthetase	137019	{FPPS} farnesyl diphosphate synthase, putative |1035.33333333333	-0.390168
16.1.3.3	secondary metabolism.isoprenoids.tocopherol biosynthesis.MPBQ/MSBQ methyltransferase	129760	{VTE3} |	0.0533831
16.1.3.4	secondary metabolism.isoprenoids.tocopherol biosynthesis.tocopherol cyclase	101649	no description |523	0.0195596
16.1.3.5	secondary metabolism.isoprenoids.tocopherol biosynthesis.tocopherol methyltransferase	129990	{VTE4} |332	#N/A
16.1.4	secondary metabolism.isoprenoids.carotenoids	182457	{ZDS} zeta-carotene desaturase, putative chloroplast precursor |1472.5	-0.0784204
16.1.4	secondary metabolism.isoprenoids.carotenoids	164400	{CHYB} beta-carotene hydroxylase, putative chloroplast precursor; PMID:15849308 |364	#N/A
16.1.4	secondary metabolism.isoprenoids.carotenoids	130438	no description |802.571531673893	0.769938
16.1.4	secondary metabolism.isoprenoids.carotenoids	196597	{CRTISO} carotenoid isomerase, putative chloroplast precursor |1325.99941377745	0.136156
16.1.4.1	secondary metabolism.isoprenoids.carotenoids.phytoene synthase	59715	{PSY,PSY1} phytoene synthase, putative chloroplast precursor |1132.75	-0.735184
16.1.4.2	secondary metabolism.isoprenoids.carotenoids.phytoene dehydrogenase	78128	{PDS} phytoene desaturase, putative chloroplast precursor |2031.525	-0.206045
16.1.4.4	secondary metabolism.isoprenoids.carotenoids.lycopene epsilon cyclase	187094	{LCYE} lycopene epsilon cyclase, putative chloroplast precursor |341|332.75	#N/A
16.1.4.5	secondary metabolism.isoprenoids.carotenoids.lycopene beta cyclase	187094	{LCYE} lycopene epsilon cyclase, putative chloroplast precursor |341|332.75	#N/A
16.1.4.21	secondary metabolism.isoprenoids.carotenoids.violaxanthin de-epoxidase	195571	{VDR1} violaxanthin de-epoxidase related, chloroplast |	#N/A
16.1.5	secondary metabolism.isoprenoids.terpenoids	196409	{CAS} cycloartenol synthase |1159.22594905095|1163	#N/A
16.1.5	secondary metabolism.isoprenoids.terpenoids	182663	{SPPS} solanesyl diphosphate synthase, putative chloroplast precursor |392	-0.00110847
13.1.2.3	amino acid metabolism.synthesis.glutamate family.arginine	58140	{AGS1} arginosuccinate synthase |946.217507450303	-0.14627
13.1.2.3	amino acid metabolism.synthesis.glutamate family.arginine	101662	{ARG7} Argininosuccinate lyase |658.5	#N/A
13.1.2.3	amino acid metabolism.synthesis.glutamate family.arginine	188762	{OTC1} |844.821802437796	0.064828
13.1.2.3.2	amino acid metabolism.synthesis.glutamate family.arginine.acetylglutamate kinase	78991	Acetylglutamate kinase-like protein, chloroplast precursor |327|327	0.268638
13.1.2.3.4	amino acid metabolism.synthesis.glutamate family.arginine.acetylornithine aminotransferase	139007	{ARG9} acetylornithine aminotransferase |464	#N/A
13.1.2.3.11	amino acid metabolism.synthesis.glutamate family.arginine.carbamoyl-phosphate synthase	128227	no description |525|525	0.758946
13.1.3.4	amino acid metabolism.synthesis.aspartate family.methionine	196483	{METC} cystathionine beta-lyase |957.510755571935	#N/A
13.1.3.4	amino acid metabolism.synthesis.aspartate family.methionine	76715	{METH} Vitamin B12 (cobalamin) dependent methionine synthase |926.71036167634	-0.696685
13.1.3.4	amino acid metabolism.synthesis.aspartate family.methionine	154307	{METE} Vitamin B12 (cobalamin) independent methionine synthase |2619.42805141356	#N/A
13.1.3.4	amino acid metabolism.synthesis.aspartate family.methionine	182408	{METM} S-Adenosylmethionine synthetase |3409.16690050146	-0.702974
13.1.3.4.2	amino acid metabolism.synthesis.aspartate family.methionine.cystathionine beta-lyase	24268	{CGS1} cystathionine gamma-synthase |562.666666666667	-0.416052
13.1.3.5	amino acid metabolism.synthesis.aspartate family.lysine	126518	{DPS1} dihydrodipicolinate synthase |1300.5191253236	-0.219708
13.1.3.5.3	amino acid metabolism.synthesis.aspartate family.lysine.LL-diaminopimelic acid aminotransferase	129557	{ATR1} aminotransferase, putative |538	0.141931
13.1.3.5.4	amino acid metabolism.synthesis.aspartate family.lysine.diaminopimelate epimerase	150957	{DPE1} diaminopimelate (DAP) epimerase, putative |398	-0.500002
13.1.3.5.5	amino acid metabolism.synthesis.aspartate family.lysine.diaminopimelate decarboxylase	146886	{DPD1} diaminopimelate (DAP) decarboxylase, putative |794	-0.6373
13.1.3.6.1.1	amino acid metabolism.synthesis.aspartate family.misc.homoserine.aspartate kinase	161455	{ASK1} aspartate kinase, monofunctional, putative |965.016666666667	#N/A
13.1.3.6.1.2	amino acid metabolism.synthesis.aspartate family.misc.homoserine.aspartate semialdehyde dehydrogenase	148810	{ASSD} |869.58610385887	-0.402997
13.1.3.6.1.10	amino acid metabolism.synthesis.aspartate family.misc.homoserine.bifunctional aspartate kinase/homoserine dehydrogenase	196320	{HSD1} homoserine dehydrogenase, putative |635.75	0.41761
13.1.4.1	amino acid metabolism.synthesis.branched chain group.common	140839	{AAI1} acetohydroxy acid isomeroreductase |1613	0.0026741
13.1.4.1	amino acid metabolism.synthesis.branched chain group.common	187392	{BCA2} branched-chain amino acid aminotransferase, putative |634.447619047619	-0.237838
13.1.4.1	amino acid metabolism.synthesis.branched chain group.common	5137	{ALSS1} acetolactate synthase, small subunit |453	-0.160813
13.1.4.1	amino acid metabolism.synthesis.branched chain group.common	138180	{ALSL1} acetolactate synthase, large subunit |2760.09345238095	#N/A
13.1.5.1.1	amino acid metabolism.synthesis.serine-glycine-cysteine group.serine.phosphoglycerate dehydrogenase	78757	{PGD1} D-3-phosphoglycerate dehydrogenase |804.542424242424	-0.133117
13.1.5.1.2	amino acid metabolism.synthesis.serine-glycine-cysteine group.serine.phosphoserine aminotransferase	188476	{PST1} phosphoserine aminotransferase |926.5	-0.0269639
13.1.5.3	amino acid metabolism.synthesis.serine-glycine-cysteine group.cysteine	191269	{NIFS1,NFS1} cysteine desulfurase, mitochondrial precursor |573	0.179341
13.1.5.3	amino acid metabolism.synthesis.serine-glycine-cysteine group.cysteine	167884	{NIFS2} cysteine desulfurase |63.9	0.25778
13.1.5.3.1	amino acid metabolism.synthesis.serine-glycine-cysteine group.cysteine.OASTL	196485	{OASTL2} cysteine synthase |994.149875124875	-0.0986616
13.1.6.1.1	amino acid metabolism.synthesis.aromatic aa.chorismate.3-deoxy-D-arabino-heptulosonate 7-phosphate synthase	192517	{SHKA1} 3-deoxy-D-arabino-heptulosonate 7-phosphate synthetase |2699.13222499083	-0.160935
13.1.6.1.2	amino acid metabolism.synthesis.aromatic aa.chorismate.3-dehydroquinate synthase	196549	{DHQS} 3-dehydroquinate synthase |918.892873791716	-0.00806385
13.1.6.1.5	amino acid metabolism.synthesis.aromatic aa.chorismate.shikimate kinase	196593	{SHKF1} possible shikimate kinase |342.016618382973	-0.451988
13.1.6.1.6	amino acid metabolism.synthesis.aromatic aa.chorismate.5-enolpyruvylshikimate-3-phosphate synthase	133088	{SHKG1} 5-enolpyruvylshikimate-3-phosphate (EPSP) synthase |2167.74929949489	-0.0594738
13.1.6.1.7	amino acid metabolism.synthesis.aromatic aa.chorismate.chorismate synthase	191993	{SHKH1} chorismate synthase, putative |1230.55033348532	-0.373301
13.1.6.5.1	amino acid metabolism.synthesis.aromatic aa.tryptophan.anthranilate synthase	79042	{ASB1} |1069	0.0855226
13.1.6.5.5	amino acid metabolism.synthesis.aromatic aa.tryptophan.tryptophan synthase	81238	{TSA} |538.75	-0.310177
13.1.1.2	amino acid metabolism.synthesis.central amino acid metabolism.aspartate	174097	{AST1} aspartate aminotransferase |860.97619047619|890.625	#N/A
13.1.1.2.1	amino acid metabolism.synthesis.central amino acid metabolism.aspartate.aspartate aminotransferase	174097	{AST1} aspartate aminotransferase |860.97619047619|890.625	#N/A
13.1.1.2.1	amino acid metabolism.synthesis.central amino acid metabolism.aspartate.aspartate aminotransferase	186959	{AAT3} aspartate aminotransferase, putative |935.886904761905	-0.020235
13.1.1.2.1	amino acid metabolism.synthesis.central amino acid metabolism.aspartate.aspartate aminotransferase	126943	{AAT4} aspartate aminotransferase, putative |795.87619047619	-0.49418
13.2.2.2	amino acid metabolism.degradation.glutamate family.proline	146649	putative proline oxidase |266.861522115917	0.17655
13.2.2.2	amino acid metabolism.degradation.glutamate family.proline	138462	{PHX} prolyl 4-hydroxylase alpha-1 subunit precursor-like protein |717.128354978355|691.045021645022	#N/A
13.2.2.2	amino acid metabolism.degradation.glutamate family.proline	150809	{ALD1} |722	0.433725
13.2.5.1	amino acid metabolism.degradation.serine-glycine-cysteine group.serine	128310	{HPR1} Hydroxypyruvate reductase |757.1625|725.9625|725.9625	-0.107447
13.2.5.1	amino acid metabolism.degradation.serine-glycine-cysteine group.serine	196595	{THD1} threonine deaminase |480	-0.249019
13.2.5.2	amino acid metabolism.degradation.serine-glycine-cysteine group.glycine	128310	{HPR1} Hydroxypyruvate reductase |757.1625|725.9625|725.9625	-0.107447
13.2.5.2	amino acid metabolism.degradation.serine-glycine-cysteine group.glycine	196242	{GCST} Glycine cleavage system, T protein |1763.25071612167	0.0510449
13.2.5.2	amino acid metabolism.degradation.serine-glycine-cysteine group.glycine	136984	{GCSP} Glycine cleavage system, P protein |4527.9	-0.266871
13.2.5.2	amino acid metabolism.degradation.serine-glycine-cysteine group.glycine	141056	Threonine aldolase family protein |341|341	0.625428
12.2.1	not assigned	140487	{FGS1} Ferredoxin-dependent glutamate synthase, chloroplast precursor |4289.75314435862	0.0153983
12.2.2	N-metabolism.ammonia metabolism.glutamine synthase	133971	{GLN1} glutamine synthetase, cytosolic |4364.93290366754	#N/A
12.2.2	N-metabolism.ammonia metabolism.glutamine synthase	136895	{GLN3} glutamine synthetase, plastid precursor |	-0.17524
12.1.1	N-metabolism.nitrate metabolism.NR	184661	{NIT1} nitrate reductase |5501.23416338563	-0.952641
12.1.1	N-metabolism.nitrate metabolism.NR	59800	{SUOX} sulfite oxidase, mitochondrial precursor |922.473896395142	-0.28471
12.1.1	N-metabolism.nitrate metabolism.NR	163751	{CBR1} NADH-cytochrome b5 reductase |608.025859002968	-0.169452
12.1.2	N-metabolism.nitrate metabolism.nitrite reductase	192085	{Nii1} |1344.6	-0.99304
23.4.1	nucleotide metabolism.phosphotransfer and pyrophosphatases.adenylate kinase	196741	{FAP42} Flagellar Associated Protein Similar to Adenylate/Guanylate Kinases |387.062494172494	#N/A
23.4.1	nucleotide metabolism.phosphotransfer and pyrophosphatases.adenylate kinase	194134	{AK3} Adenylate Kinase Homolog 3 |667.039381988381	-0.267949
23.4.1	nucleotide metabolism.phosphotransfer and pyrophosphatases.adenylate kinase	118113	{AK6} Adenylate Kinase Homolog 6 |717.133115079365	-0.200034
23.4.1	nucleotide metabolism.phosphotransfer and pyrophosphatases.adenylate kinase	194947	{FAK1} Flagellar Adenylate Kinase Homolog1 |50.1	#N/A
23.4.1	nucleotide metabolism.phosphotransfer and pyrophosphatases.adenylate kinase	133184	{AK4} Adenylate Kinase Homolog 2 |763.323452380952	-0.533451
23.4.2	nucleotide metabolism.phosphotransfer and pyrophosphatases.guanylate kinase	111725	no description |	-0.238068
23.4.3	nucleotide metabolism.phosphotransfer and pyrophosphatases.uridylate kinase	141571	no description |388.5	-0.156088
23.4.3	nucleotide metabolism.phosphotransfer and pyrophosphatases.uridylate kinase	114363	{AK2} Adenylate Kinase Homolog 2 |310.333333333333	0.135926
23.4.3	nucleotide metabolism.phosphotransfer and pyrophosphatases.uridylate kinase	129362	{FAK1} ODA5-associated flagellar adenylate kinase |326.666666666667	#N/A
23.4.3	nucleotide metabolism.phosphotransfer and pyrophosphatases.uridylate kinase	103322	{AK5} Adenylate Kinase |271.333333333333	#N/A
23.4.10	nucleotide metabolism.phosphotransfer and pyrophosphatases.nucleoside diphosphate kinase	180221	{FAP67} Flagellar Associated Protein |418.06984453047	#N/A
23.4.10	nucleotide metabolism.phosphotransfer and pyrophosphatases.nucleoside diphosphate kinase	139197	{RSP23} Radial spoke protein 23 |476.474664502164	-0.196928
23.4.10	nucleotide metabolism.phosphotransfer and pyrophosphatases.nucleoside diphosphate kinase	58944	{FAP103} Flagellar Associated Protein Similar to Nucleoside Diphosphate Kinase |1218.06927863803	0.540259
23.4.99	nucleotide metabolism.phosphotransfer and pyrophosphatases.misc	78991	Acetylglutamate kinase-like protein, chloroplast precursor |327|327	0.268638
23.4.99	nucleotide metabolism.phosphotransfer and pyrophosphatases.misc	133620	{IPY1} |1034.1169047619	-0.551066
23.4.99	nucleotide metabolism.phosphotransfer and pyrophosphatases.misc	174103	{IPY3} |1340.61071428571	-0.0444885
23.1.2.3	nucleotide metabolism.synthesis.purine.GAR transformylase	117678	no description |612.5	0.0722865
23.1.2.4	nucleotide metabolism.synthesis.purine.FGAR amidotransferase	131059	AIR synthase related protein |1509	-0.115498
23.1.2.5	nucleotide metabolism.synthesis.purine.AIR synthase	54374	no description |1136.55241957828	0.13127
23.1.2.6	nucleotide metabolism.synthesis.purine.AIR carboxylase	196726	{PUR6} Phosphoribosylaminoimidazole carboxylase, eukaryotic-type |882.86680227045	0.477945
23.1.2.9	nucleotide metabolism.synthesis.purine.AICAR transformylase and IMP synthase	116979	no description |445.174086267149	-0.452748
23.1.2.31	nucleotide metabolism.synthesis.purine.GMP synthetase	126329	{GUA1} GMP synthetase |807.806466379353	-0.137085
23.4.1	nucleotide metabolism.phosphotransfer and pyrophosphatases.adenylate kinase	196741	{FAP42} Flagellar Associated Protein Similar to Adenylate/Guanylate Kinases |387.062494172494	#N/A
23.4.1	nucleotide metabolism.phosphotransfer and pyrophosphatases.adenylate kinase	194134	{AK3} Adenylate Kinase Homolog 3 |667.039381988381	-0.267949
23.4.1	nucleotide metabolism.phosphotransfer and pyrophosphatases.adenylate kinase	118113	{AK6} Adenylate Kinase Homolog 6 |717.133115079365	-0.200034
23.4.1	nucleotide metabolism.phosphotransfer and pyrophosphatases.adenylate kinase	194947	{FAK1} Flagellar Adenylate Kinase Homolog1 |50.1	#N/A
23.4.1	nucleotide metabolism.phosphotransfer and pyrophosphatases.adenylate kinase	133184	{AK4} Adenylate Kinase Homolog 2 |763.323452380952	-0.533451
23.4.2	nucleotide metabolism.phosphotransfer and pyrophosphatases.guanylate kinase	111725	no description |	-0.238068
23.4.3	nucleotide metabolism.phosphotransfer and pyrophosphatases.uridylate kinase	141571	no description |388.5	-0.156088
23.4.3	nucleotide metabolism.phosphotransfer and pyrophosphatases.uridylate kinase	114363	{AK2} Adenylate Kinase Homolog 2 |310.333333333333	0.135926
23.4.3	nucleotide metabolism.phosphotransfer and pyrophosphatases.uridylate kinase	129362	{FAK1} ODA5-associated flagellar adenylate kinase |326.666666666667	#N/A
23.4.3	nucleotide metabolism.phosphotransfer and pyrophosphatases.uridylate kinase	103322	{AK5} Adenylate Kinase |271.333333333333	#N/A
23.4.10	nucleotide metabolism.phosphotransfer and pyrophosphatases.nucleoside diphosphate kinase	180221	{FAP67} Flagellar Associated Protein |418.06984453047	#N/A
23.4.10	nucleotide metabolism.phosphotransfer and pyrophosphatases.nucleoside diphosphate kinase	139197	{RSP23} Radial spoke protein 23 |476.474664502164	-0.196928
23.4.10	nucleotide metabolism.phosphotransfer and pyrophosphatases.nucleoside diphosphate kinase	58944	{FAP103} Flagellar Associated Protein Similar to Nucleoside Diphosphate Kinase |1218.06927863803	0.540259
23.4.99	nucleotide metabolism.phosphotransfer and pyrophosphatases.misc	78991	Acetylglutamate kinase-like protein, chloroplast precursor |327|327	0.268638
23.4.99	nucleotide metabolism.phosphotransfer and pyrophosphatases.misc	133620	{IPY1} |1034.1169047619	-0.551066
23.4.99	nucleotide metabolism.phosphotransfer and pyrophosphatases.misc	174103	{IPY3} |1340.61071428571	-0.0444885
23.5.2	nucleotide metabolism.deoxynucleotide metabolism.pseudouridine synthase	96859	{PUS3} RNA pseudourine synthase, mitochondrial precursor, putative |385.313333333333|385.313333333333	#N/A
23.5.2	nucleotide metabolism.deoxynucleotide metabolism.pseudouridine synthase	96831	{PUS4} tRNA pseudouridine synthase, mitochondrial precursor, putative |287.6|268.2	#N/A
23.5.2	nucleotide metabolism.deoxynucleotide metabolism.pseudouridine synthase	151084	{PUS1} tRNA pseudouridine synthase, mitochondrial precursor, putative |129.75|129.75	#N/A
23.5.4	nucleotide metabolism.deoxynucleotide metabolism.ribonucleoside-diphosphate reductase	185583	{RIR1} ribonucleoside-diphosphate reductase large subunit |1216	-0.405978
23.5.4	nucleotide metabolism.deoxynucleotide metabolism.ribonucleoside-diphosphate reductase	144621	{RIR2B} ribonucleoside-diphosphate reductase small subunit |1125.5	#N/A
10.1.1.1	cell wall.precursor synthesis.NDP sugar pyrophosphorylase.GDP mannose	130417	{GMP1} GDP-D-mannose pyrophosphorylase |889.666666666667	-0.074077
10.1.1.20	cell wall.precursor synthesis.NDP sugar pyrophosphorylase.multiple NDP-Sugars	32796	{UAP2} UDP-N-acetylglucosamine-pyrophosphorylase like protein |410	#N/A
10.1.4	cell wall.precursor synthesis.UGD	185081	{UGD2} UDP-glucose dehydrogenase |2290.35	#N/A
10.1.5	cell wall.precursor synthesis.UXS	135101	{GAD1} UDP-D-glucuronic acid decarboxylase |1179.86666666667	0.633166
10.1.6	cell wall.precursor synthesis.GAE	151368	{NDE2} NAD-dependent epimerase/dehydratase |879.583333333333	-0.0801434
10.1.10	cell wall.precursor synthesis.RHM	158152	no description |430.333333333333|419	-0.204474
10.1.10	cell wall.precursor synthesis.RHM	111778	no description |814.166666666667	0.483317
10.1.11	cell wall.precursor synthesis.UER	158152	no description |430.333333333333|419	-0.204474
10.1.20	cell wall.precursor synthesis.phosphomannose isomerase	196572	{MPI} mannose-6-phosphate isomerase like |375	#N/A
2.1.2.1	major CHO metabolism.synthesis.starch.AGPase	136037	{STA6 } ADP-glucose pyrophosphorylase small subunit |3220.97731712984	-0.130325
2.1.2.2	major CHO metabolism.synthesis.starch.starch synthase	185710	soluble starch synthase, ADP-glucose alpha-1,4 glucane alpha-4-glucanotransferase |1369.10480302721	-0.256955
2.1.2.2	major CHO metabolism.synthesis.starch.starch synthase	503	{STA2} Putative granule-bound starch synthase I |2546.20204501325	#N/A
2.1.2.2	major CHO metabolism.synthesis.starch.starch synthase	191662	{STA3} soluble starch synthase III , ADP-glucose alpha-1,4 glucane alpha-4-glucanotransferase |1545.52054535248	-0.368774
2.1.2.3	major CHO metabolism.synthesis.starch.starch branching	118976	{Starch Branching Enzyme} Starch Branching Enzyme |2598.53333333333	0.0997959
2.1.2.3	major CHO metabolism.synthesis.starch.starch branching	94079	{Starch Branching Enzyme} Starch Branching Enzyme |2393.84166666667	-0.331191
2.1.2.4	major CHO metabolism.synthesis.starch.debranching	132067	isoamylase, starch debranching enzyme |1080.05833333333	0.492388
2.1.2.5	major CHO metabolism.synthesis.starch.transporter	196520	{ANT1} ANT1 Adenine Nucleotide Translocator 1, mitochondrial |1946.37936507937	0.0882739
2.2.2.1	major CHO metabolism.degradation.starch.starch cleavage	128630	{GLH1} glycoside-hydrolase-like protein |1400.78015873016|1400.78015873016	#N/A
2.2.2.1	major CHO metabolism.degradation.starch.starch cleavage	112511	{beta-amylase} beta-amylase |1358.53622375137	-0.245425
2.2.2.1	major CHO metabolism.degradation.starch.starch cleavage	129211	beta-amylase |1325.83720005299	#N/A
2.2.2.1	major CHO metabolism.degradation.starch.starch cleavage	58178	{alpha-amylase} alpha-amylase |1742.14436396936	1.18645
2.2.2.3	major CHO metabolism.degradation.starch.glucan water dikinase	192398	no description |1014.445	#N/A
2.2.2.4	major CHO metabolism.degradation.starch.D enzyme	122203	no description |999.81908127401	-0.749921
2.2.2.4	major CHO metabolism.degradation.starch.D enzyme	140452	{STA11 } 4-alpha-glucanotransferase |1064.51870473098	0.576768
21.2	redox.ascorbate and glutathione	139735	{MDAR} monodehydroascorbate reductase |915	#N/A
21.2	redox.ascorbate and glutathione	131692	{CYB5_1} |326.808712121212	0.0895455
21.2	redox.ascorbate and glutathione	149810	no description |126	-0.0033076
21.2.1	redox.ascorbate and glutathione.ascorbate	146799	no description |174.675	0.272345
21.2.1	redox.ascorbate and glutathione.ascorbate	186597	{APX1} ascorbate peroxidase |1281.90281723108	-0.757633
21.2.1	redox.ascorbate and glutathione.ascorbate	143082	{DHAR} dehydroascorbate reductase |286.806666666667	0.714736
21.2.2	redox.ascorbate and glutathione.glutathione	188373	{GPX4} Glutathione peroxidase, possibly chloroplastic |703.902930460401	#N/A
21.2.2	redox.ascorbate and glutathione.glutathione	134165	{GSHR1} glutathione reductase |1946.49404761905	0.207384
21.2.2	redox.ascorbate and glutathione.glutathione	181975	{GSH1} |1676.62752821131	-0.24529
1.1.1.1	PS.lightreaction.photosystem II.LHC-II	98563	no description |394.364782714705|411.088137566138	#N/A
1.1.1.1	PS.lightreaction.photosystem II.LHC-II	184810	{Lhcb4} |1225.13066192216	-0.568925
1.1.1.2	PS.lightreaction.photosystem II.PSII polypeptide subunits	127879	no description |155	#N/A
1.1.1.2	PS.lightreaction.photosystem II.PSII polypeptide subunits	187371	no description |96.3	-0.548697
1.1.1.2	PS.lightreaction.photosystem II.PSII polypeptide subunits	155150	{PSBW} Photosystem II subunit W, chloroplast precursor |392.25	-1.18099
1.1.1.2	PS.lightreaction.photosystem II.PSII polypeptide subunits	187308	{OHP1} low CO2 and stress-induced one-helix protein |100	-0.508478
1.1.1.2	PS.lightreaction.photosystem II.PSII polypeptide subunits	153656	{OEE3} oxygen-evolving enhancer protein 3, chloroplast precursor, (PSBQ) |631.199339936184	-1.28286
1.1.1.2	PS.lightreaction.photosystem II.PSII polypeptide subunits	196341	{PSBS} chloroplast PsbS |301	#N/A
1.1.1.2	PS.lightreaction.photosystem II.PSII polypeptide subunits	130316	{PSBO} Oxygen-evolving enhancer protein 1 of photosystem II |1730.18865003427	-0.137907
1.1.2.1	PS.lightreaction.photosystem I.LHC-I	98563	no description |394.364782714705|411.088137566138	#N/A
1.1.2.1	PS.lightreaction.photosystem I.LHC-I	153678	{LHCA3} light-harvesting chlorophyll-a/b protein of photosystem I (Type III) |527.077521008403	-0.722848
1.1.2.2	PS.lightreaction.photosystem I.PSI polypeptide subunits	76146	{PSAE} |338.8125	-0.562182
1.1.2.2	PS.lightreaction.photosystem I.PSI polypeptide subunits	182959	no description |533.579054877507	-0.222942
1.1.2.2	PS.lightreaction.photosystem I.PSI polypeptide subunits	193847	{PSAO } Photosystem I subunit O |91.3	-0.822218
1.1.2.2	PS.lightreaction.photosystem I.PSI polypeptide subunits	130914	{PSAF} photosystem I reaction center subunit III, chloroplast precursor |919.660633253035	-0.524787
1.1.2.2	PS.lightreaction.photosystem I.PSI polypeptide subunits	165416	{PSAG} photosystem I reaction center subunit V, chloroplast precursor |329.011764764664	-0.257862
1.1.4	PS.lightreaction.ATP synthase	132678	{ATPD} ATP synthase delta chain, chloroplast precursor |836.291666666667	-0.403634
1.1.4	PS.lightreaction.ATP synthase	134235	{ATPC} ATP synthase gamma chain, chloroplast precursor |1653.25	-0.641375
1.1.5.1	PS.lightreaction.other electron carrier (ox/red).plastocyanin	185915	{PCY1} plastocyanin, chloroplast precursor |871.739590518136	-0.654938
1.1.5.2	PS.lightreaction.other electron carrier (ox/red).ferredoxin	196705	{FDX4} Apoferredoxin, chloroplast precursor |208.689458293731	#N/A
1.1.5.2	PS.lightreaction.other electron carrier (ox/red).ferredoxin	174881	possible 2Fe-2S ferredoxin |118.2	-0.496203
1.1.5.2	PS.lightreaction.other electron carrier (ox/red).ferredoxin	196707	{FDX3} Apoferredoxin, chloroplast precursor |335.042155263038	#N/A
1.1.5.2	PS.lightreaction.other electron carrier (ox/red).ferredoxin	147787	{PETF} Apoferredoxin, chloroplast precursor |958.108606589489	-0.2194
1.1.5.2	PS.lightreaction.other electron carrier (ox/red).ferredoxin	196703	{FDX6} Apoferredoxin, chloroplast precursor |258.725633383224	-0.498679
1.1.5.3	PS.lightreaction.other electron carrier (ox/red).ferredoxin reductase	134840	{ARH1} NADP adrenodoxin-like ferredoxin reductase |362	#N/A
1.1.6	PS.lightreaction.NADH DH	182980	{NUO9 } NADH:ubiquinone oxidoreductase (Complex I) ND9 subunit, mitochondrial |232.142277722278	-0.14612
1.1.30	PS.lightreaction.state transition	194793	{STT7} protein kinase involved in state transitions |1934.33333333333	-0.0316379
1.1.30	PS.lightreaction.state transition	154569	{STL1} Serine/threonine protein kinase, active site, Stl1 (Q84V17_CHLRE) |426.5|473.77529961882	-0.314703
1.1.40	PS.lightreaction.cyclic electron flow-chlororespiration	185013	{NUO7 } NADH:ubiquinone oxidoreductase (Complex I) ND7 subunit, mitochondrial |1339.46529279544	0.105143
1.1.40	PS.lightreaction.cyclic electron flow-chlororespiration	189624	{PTOX1} alternative oxidase, possibly chloroplast-localized |235	0.244375
1.1.40	PS.lightreaction.cyclic electron flow-chlororespiration	132909	{NUO8 } NADH:ubiquinone oxidoreductase (Complex I) subunit, homolog to bovine TYKY subunit, mitochondrial |591.181939053593|562	-0.294389
1.3.2	PS.calvin cyle.rubisco small subunit	82986	{RBCS1} ribulose-1,5-bisphosphate carboxylase/oxygenase small subunit 1, chloroplast precursor |1851.82989553062	-0.474829
1.3.3	PS.calvin cyle.phosphoglycerate kinase	132210	{PGK1} Phosphoglycerate Kinase |2493.95	-1.21342
1.3.4	PS.calvin cyle.GAP	129019	{GAP3} Glyceraldehyde-3-Phosphate Dehydrogenase |2253.94480519481	-0.605775
1.3.4	PS.calvin cyle.GAP	102889	{GAPN1} Glyceraldehyde 3-phosphate dehydrogenase, nonphosphorylating |2046.5	0.226073
1.3.5	PS.calvin cycle.TPI	26265	{TPIC} triose phosphate isomerase (TIM), chloroplast precursor |896.666666666667	-0.155733
1.3.6	PS.calvin cyle.aldolase	24459	no description |2143.72777777778	1.77756
1.3.7	PS.calvin cyle.FBPase	24084	{FBP} Fructose-1,6-bisphosphatase, plastid precursor |1818	-0.250239
1.3.8	PS.calvin cyle.transketolase	141319	{TRK} Transketolase, plastid precursor |2676.15	-0.205677
1.3.9	PS.calvin cyle.seduheptulose bisphosphatase	189186	{SBP1} sedoheptulose-1,7-bisphosphatase |1767.125	-0.511888
1.3.11	PS.calvin cyle.RPE	135614	{RPE1} Ribulose phosphate-3-epimerase, chloroplast precursor |666.142139620753	-0.0759703
1.3.12	PS.calvin cyle.PRK	195910	{PRK} Phosphoribulokinase, chloroplast precursor |2429.25	-0.587812
1.3.13	PS.calvin cyle.rubisco interacting	150261	{PMT} protein N-methyltransferase |142.65	#N/A
1.3.13	PS.calvin cyle.rubisco interacting	193086	no description |453	-0.0522656
1.3.13	PS.calvin cyle.rubisco interacting	128745	{RCA} rubisco activase |3314.74356060606	-0.547165
1.3.13	PS.calvin cyle.rubisco interacting	150732	no description |136.68	0.0584666
1.2.1	PS.photorespiration.phosphoglycolate phosphatase	142105	{PGP3} Phosphoglycolate phosphatase, chloroplast precursor |591.554681163532	-0.61134
1.2.1	PS.photorespiration.phosphoglycolate phosphatase	127857	{PGP2} Phosphoglycolate phosphatase, chloroplast precursor |393.39588108745	0.472865
1.2.1	PS.photorespiration.phosphoglycolate phosphatase	196298	{PGP1} phosphoglycolate phosphatase 1 |806	#N/A
1.2.2	PS.photorespiration.glycolate oxydase	127775	{GOX} Glycolate oxidase |836	#N/A
1.2.3	PS.aminotransferases peroxisomal	194541	{AGT1} alanine-glyoxylate transaminase, putative |135|135	-0.38954
1.2.3	PS.aminotransferases peroxisomal	194609	{SGA1} Putative serine glyoxylate aminotransferase, variant SGA1a |398|398	0.410186
1.2.4	PS.photorespiration.glycine cleavage	196067	{GCSH} glycine cleavage system, H-protein |632.429801916239	-0.402131
1.2.5	PS.photorespiration.serine hydroxymethyltransferase	196400	{SHMT3} serine hydroxymethyltransferase 3 |2962.10780920636	0.282044
1.2.5	PS.photorespiration.serine hydroxymethyltransferase	196354	{SHMT2} serine hydroxymethyltranferase 2 |2880.26084170815	-1.1199
1.2.5	PS.photorespiration.serine hydroxymethyltransferase	194461	{SHMT1} Serine hydroxymethyltransferase |3377.14404761905	-0.0715537
1.2.6	PS.photorespiration.hydroxypyruvate reductase	128310	{HPR1} Hydroxypyruvate reductase |757.1625|725.9625|725.9625	-0.107447
1.2.7	PS.photorespiration.glycerate kinase	196366	{GLYK} glycerate kinase |192	0.480979
19.1	tetrapyrrole synthesis.glu-tRNA synthetase	135584	{CHLI2 } CHLI Magnesium chelatase subunit I, chloroplast precursor |1379.64642857143	-0.243663
19.1	tetrapyrrole synthesis.glu-tRNA synthetase	188401	{GAT1} Glutamyl tRNA amidotransferase, subunit A |410	#N/A
19.1	tetrapyrrole synthesis.glu-tRNA synthetase	195543	{GTS1 } Gln-Glu (Glx) non discriminatory tRNA synthetase, chloroplast precursor |661.16|704.51	-0.117264
19.1	tetrapyrrole synthesis.glu-tRNA synthetase	134594	{CHLD } Magnesium chelatase subunit D, chloroplast precursor |1962.64404761905	#N/A
19.2	tetrapyrrole synthesis.glu-tRNA reductase	183460	{HEMA} Glutamyl-tRNA reductase, chloroplast precursor |2370.69126158217	-0.358139
19.2	tetrapyrrole synthesis.glu-tRNA reductase	183446	{HEM15 } Ferrochelatase, chloroplast precursor |778.8	0.0708229
19.3	tetrapyrrole synthesis.GSA	138524	{GSA } Glutamate-1-semialdehyde aminotransferase, chloroplast precursor |2933.02857142857	-0.430077
19.4	tetrapyrrole synthesis.ALA dehydratase	186639	{ALAD ,ALAD} Delta-aminolevulinic acid dehydratase, chloroplast precursor |2251.94369230574	-0.75503
19.5	tetrapyrrole synthesis.porphobilinogen deaminase	194475	{PBGD1} Porphobilinogen deaminase, putative chloroplast precursor |1068.59288744443	-0.602704
19.6	tetrapyrrole synthesis.uroporphyrinogen III synthase	195943	{UROS} Uroporphyrinogen-III synthase, putative chloroplast precursor |259.251209461613	-0.619903
19.7	tetrapyrrole synthesis.uroporphyrinogen decarboxylase	132194	{UROD1} Uroporphyrinogen-III decarboxylase, chloroplast precursor |1674.84288975886	0.180396
19.7	tetrapyrrole synthesis.uroporphyrinogen decarboxylase	195818	{UROD3} Uroporphyrinogen decarboxylase |1330.69658266168	-0.369136
19.8	tetrapyrrole synthesis.coproporphyrinogen III oxidase	53583	{CPX1} Coproporphyrinogen III oxidase, chloroplast precursor |1314.35	-0.424772
19.9	tetrapyrrole synthesis.protoporphyrin IX oxidase	191043	{PPO} Protoporphyrinogen oxidase, chloroplast precursor |1170.85	-0.191413
19.10	tetrapyrrole synthesis.magnesium chelatase	195524	{CHLH1} CHLH Magnesium chelatase subunit H, chloroplast precursor |1795	-0.472568
19.11	tetrapyrrole synthesis.magnesium protoporphyrin IX methyltransferase	195575	{CHLM} Magnesium protoporphrin IX S-adenosyl methionine O-methyl transferase, chloroplast precursor |307	-0.429405
19.13	tetrapyrrole synthesis.divinyl chlorophyllide-a 8-vinyl-reductase	195952	{DVR} 3,8-divinyl protochlorophyllide a 8-vinyl reductase, chloroplast precursor |419	-0.557086
19.15	tetrapyrrole synthesis.chlorophyll synthase	5437	{CHS,CHLG} Chlorophyll synthetase, chloroplast precursor |421	-0.0292312
19.16	tetrapyrrole synthesis.chlorophyll b synthase	195951	{CAO} Chlorophyll a oxygenase, chloroplast precursor |417	-0.368816
19.21	tetrapyrrole synthesis.heme oxygenase	195947	{HMOX1} Heme oxygenase |292.933333333333	-0.152041
19.30	tetrapyrrole synthesis.urogen III methylase	191432	{COB1} S-adenosyl-L-methionine-dependent uroporphyrinogen III methyltransferase |563.541527832149	#N/A
19.40	tetrapyrrole synthesis.regulation	127367	{FLU} FLU chloroplast precursor |90.5	-0.509719
19.99	tetrapyrrole synthesis.unspecified	123320	{COX10 } cytochrome c oxidase assembly protein, heme A: farnesyltransferase |505.221712385125	#N/A
9.1.2	mitochondrial electron transport / ATP synthesis.NADH-DH.localisation not clear	193762	{NUO13 } NADH:ubiquinone oxidoreductase (Complex I) 18 kDa subunit, homolog to bovine B17.2 subunit, mitochondrial |80.1	-0.722007
9.1.2	mitochondrial electron transport / ATP synthesis.NADH-DH.localisation not clear	186185	{NUOA9 } NADH:ubiquinone oxidoreductase (Complex I) subunit, homolog to bovine 39 kD subunit, mitochondrial |224	-0.163984
9.1.2	mitochondrial electron transport / ATP synthesis.NADH-DH.localisation not clear	127317	{NUO5 } NADH:ubiquinone oxidoreductase (Complex I) 24 kDa subunit, homolog to bovine 24 kD subunit, mitochondrial |271	-0.242765
9.1.2	mitochondrial electron transport / ATP synthesis.NADH-DH.localisation not clear	79362	{NUOS1} NADH:ubiquinone oxidoreductase 76 kD protein (Complex I 78 kD subunit), mitochondrial |724	-0.308749
9.1.2	mitochondrial electron transport / ATP synthesis.NADH-DH.localisation not clear	132909	{NUO8 } NADH:ubiquinone oxidoreductase (Complex I) subunit, homolog to bovine TYKY subunit, mitochondrial |591.181939053593|562	-0.294389
9.1.2	mitochondrial electron transport / ATP synthesis.NADH-DH.localisation not clear	186342	{NUO6 } NADH:ubiquinone oxidoreductase (Complex I) subunit, homolog to bovine 51 kD subunit, mitochondrial |745	#N/A
9.2.1	mitochondrial electron transport / ATP synthesis.NADH-DH.type II.internal matrix	195719	{NDA1} putative mitochondrial type-II NADH dehydrogenase. |557	#N/A

## Sheet: Table S4
Table S4: The number of attribute weighting algorithm for all meta genes.
Protein ID (JGI v4.0 ID)	Annotated Name	Info Gain Ratio	Info Gain	Gini Index	Chi Squared	Rule	Uncertainty	count 50%
55268	HDS	0.01822	0.367246	0.888889	0	0.451429	0.00757956	2
56237	FAD7	0.0952381	0.467246	1	0.111111	0.42	0.00757956	2
76602	ATP1A	0.380952	0.424578	0.777778	0.111111	0.571429	0.00757956	2
111372	PfkB	0.23132	0.292122	0.777778	0.111111	0.571429	0.810442	3
132210	PGK1	0.227458	0.212193	0.447778	0.222222	0.1	0.468311	0
135322	CSP41b	0.0272449	0.402122	0.777778	0.222222	0.952381	0.792784	3
136810	ChlP	0.0272449	0.2968	0	0.652222	0.952381	0.788783	3
139619	KAS2	0.0272449	0.4968	0	0.292822	0.952381	0.578313	3
150826	TEF9	0.0272449	0.4348	0	0.220922	0.2	0.423125	0
152648	CPLD48	0.411457	0.434002	0	0.222175	0.238095	0.278225	0
153656	PSBQ	0.597458	0.4968	0.111111	0.454232	0.952381	0.782782	5
158745	AMT1A	0.316753	0.145779	0.111111	0.222222	0.238095	0.718062	1
159574	GLPX1	0.597458	0.587073	0.111111	0.229222	1	0.593804	4
165416	PSAG	0.748358	0.311458	0.341111	1	1	0.726314	4
175746	ESD	0.768139	0.311458	0.113451	1	1	0.771429	4
182361	TEF14	0.138854	0.114578	0.123563	0.237778	0.216452	0.320904	0
182896	PSB28	0.138854	0.187886	0.231111	0.407778	1	0.603591	2
184661	NIT1	0.308849	0.169062	0.222222	0.555556	1	0.767223	3
185309	LHL3	0.768139	0.702084	0.222222	0.0272449	1	0.591495	4
185571	CYN20-3	0.388545	0.355169	0.538095	0.0272449	1	0.42844	2
192085	NII1	0.0543	0.245785	0.388529	0.222222	0.11	0.427727	0
194676	TEF2	0.448849	0.355169	0.400846	0.388529	0	0.426291	0
195417	CLPD	0.138854	0.208355	0.0272449	0.529106	0.43534	0.506112	2
195423	CLPB1	0.348849	0.169062	0.445785	0.467246	1	0.150551	2
195952	DVR1	0.713885	0.702084	0.0036914	0.444444	1	0.405669	3
196354	SHMT2	0.238911	0.208355	0.45212	0.344444	0.904762	0.878006	3
196500	DLA2	0.0056	0.0388529	0.334211	0.444444	0.247619	0.626291	1
196604	CMS	0.05654	0.291065	0.333333	0.444444	0.957619	0.487453	1
205649	TL19	0.23122	0.388529	0.23	0.424578	0.41619	0.533881	1
205993	TEF30	0.138854	0.208355	0.333333	0.0036914	0.3	0.522855	1
206548	APX	0.32	0.245785	0.483333	0.467246	0.904762	0.75209	4
345325	NAR3	0.0211234	0.0663	0.208355	0.311458	0.047619	0.119009	0
117883	SCD	0.713885	0.467246	0.23132	0.555556	1	0.763021	5
144607		0.222937	0.424578	0.424066	0.538095	0.12	0.513807	2
151316	WD40	0.222937	0.424578	0.0036914	0.23132	1	0.434347	1
182023	hypothetical protein	0.222937	0.0036914	0.422725	0.400725	0.35	0.433031	0
183558	DUF	0.222937	0.0036914	0.311458	0.330926	0.604762	0.538043	2
183986	Chloroa_b-bind	0.222937	0.311458	0.23132	0.381233	0.190476	0.593804	1
192088	NAR4	0.222937	0.011	0.414568	0.433333	0.619048	0.533	2
286834	F4J9G2	0.222937	0.245785	0.0272449	0.122222	0.619048	0.493663	1
344487	hypothetical protein	0.222937	0.467246	0	0.222265	0.47	0.49221	2
	species	0.222937	0.467246	0	0.222346	0	0.361478	1

## Sheet: Table S5
Table S5: Application of 10 different attributes weighting algorithms on D.salina meta genes
Model	Attribute	Weight
SVM	DVR1	0.9
	ATP1A	0.6
	PfkB	0.5
Relief	PGK1	0.8
Uncertainty	PSBQ	1
	SCD , ESD, PSAG	0.7
	GLPX1	0.6
Gini Index	PSBQ	0.9
Chi Squared	ChlP ,TEF2 ,PSBQ ,AMT1A	0.9
	KAS2	0.6
	DVR1	0.5
Deviation	SCD	0.8
	HDS	0.6
	FAD7	0.8
Info Gain Ratio	ATP1A, CLPD	1
Info Gain	ChlP	1
Rule	SCD	1
	PSBQ	0.7
	AMT1A	0.6
	DVR1	0.5
	PSAG	0.9

## Sheet: Table S6
Table S6: Application of 10 different attributes weighting algorithms on D.tertiolecta meta genes
Model	Attribute	Weight
SVM	KAS2	1
	SCD	0.8
Relief	CPLD48	0.7
	PSBQ	1
Uncertainty	AMT1A	1
	GLPX1	0.8
Gini Index	PfkB	0.6
	SCD	0.7
	CSP41b	0.5
	DVR1	0.9
Chi Squared	TEF14	1
	PSB28	0.8
	NIT1	0.7
Deviation	LHL3	0.8
	CYN20-3	0.6
	SCD	0.8
Info Gain Ratio	ChlP	1
	KAS2	0.9
	TEF9	0.5
	CPLD48	0.6
Info Gain	PSBQ	1
	KAS2	0.7
	ChlP	0.8
Rule	ESD, NIT1	1
	DVR1 , LHL3	0.7
	PSB28	0.6
	CYN20-3	0.5
	SCD	0.9
